# Supplementary material for: Isolation and characterization of gluten protein types from wheat, rye, barley and oats for use as reference materials
Source: PubMed Central journal article supplement (PMC5325591; doi:10.1371/journal.pone.0172819), 2017-02-24
Supplement: pone.0172819.s004.pdf [file pone.0172819.s004.pdf]

**S1 Table. Peptides identified in each isolated wheat gluten protein type.** Peptide sequences, their scores, *m/z* ratios, charge states and relative molecular weights (*M<sub>r</sub>*). For corresponding protein sequences, see S5 Table.

| Abbreviation  | Gluten protein type<br>Peptide sequence | Peptide score | <i>m/z</i><br>(charge state) | <i>M<sub>r</sub></i> |
|---------------|-----------------------------------------|---------------|------------------------------|----------------------|
| <b>HMW-GS</b> |                                         |               |                              |                      |
| HG.1          | YPTSLQQTGQGQSGQGQQGY                    | 62            | 802.49 (+3)                  | 2403.08              |
| HG.2          | LQPGQGQQGY                              | 58            | 538.16 (+2)                  | 1074.52              |
| HG.3          | YPGQASSQRPGQGQQPGQGQQEY                 | 56            | 826.32 (+3)                  | 2475.12              |
| HG.4          | QQTGGGQSGQGQQGY                         | 56            | 921.92 (+2)                  | 1841.80              |
| HG.5          | QPEQLQQPTQGQQRQQPGQGQQ                  | 55            | 877.73 (+3)                  | 2629.30              |
| HG.6          | WQPGQGQQGY                              | 54            | 574.72 (+2)                  | 1147.51              |
| HG.7          | YLTSPQSGQW                              | 53            | 647.78 (+2)                  | 1293.61              |
| HG.8          | YLSVTSPQVSY                             | 51            | 686.69 (+2)                  | 1370.68              |
| HG.9          | SSSLQQPGQGLQGHYPASL                     | 51            | 652.60 (+3)                  | 1953.96              |
| HG.10         | TASLQQPGQGQQGHYPASL                     | 46            | 656.94 (+3)                  | 1966.96              |
| HG.11         | YPGQASSQRPGQGQQPGQGQQEYY                | 46            | 880.43 (+3)                  | 2638.19              |
| HG.12         | QLGQGQQGY                               | 43            | 489.71 (+2)                  | 977.46               |
| HG+HS.1       | QQPGQGQQPGQW                            | 42            | 669.79 (+2)                  | 1337.62              |
| HG.13         | LQPGQGQQGYPTSL                          | 41            | 819.26 (+2)                  | 1635.80              |
| HG.14         | YYPTSPQESGQGQQPGQW                      | 41            | 1019.84 (+2)                 | 2036.89              |
| HG.15         | STSLQQPGQGQQGHYPASL                     | 41            | 992.96 (+2)                  | 1982.95              |
| HG.16         | QQTGGGQSGQGQQGY                         | 41            | 840.61 (+2)                  | 1678.74              |
| HG.17         | SQPRQGQQGY                              | 40            | 574.72 (+2)                  | 1147.54              |
| HG+HS.2       | HVSAEHQAASL                             | 40            | 575.34 (+2)                  | 1148.56              |
| HG.18         | LSVTSPQVSY                              | 39            | 604.73 (+2)                  | 1207.62              |
| HG.19         | SSYHVSVEHQAASL                          | 39            | 757.95 (+2)                  | 1513.72              |
| HG.20         | QQPGQGQPGYY                             | 38            | 611.76 (+2)                  | 1221.55              |
| HG.21         | TTSLQQSGQGQQGY                          | 36            | 741.88 (+2)                  | 1481.68              |
| HG.22         | QQPGQGQQGHYPASL                         | 35            | 798.39 (+2)                  | 1594.76              |
| HG.23         | QQPGQGQQGHY                             | 35            | 798.39 (+2)                  | 1226.55              |
| HG.24         | HQSGQGQQGYPTSL                          | 34            | 825.85 (+2)                  | 1649.75              |
| HG.25         | KRYPSVTSPQVSY                           | 34            | 902.29 (+2)                  | 1801.91              |
| HG+HS.3       | HVSVEHQAASL                             | 33            | 589.34 (+2)                  | 1176.60              |
| HG.26         | TASLQQPGQGQQGHYPASLQQVGGQQIGQL          | 33            | 1078.65 (+3)                 | 3231.61              |
| HG.27         | QQPGQWQQPGQGQPGYY                       | 32            | 974.29 (+2)                  | 1945.88              |
| HG.28         | QQSGQGQPGYYPTSL                         | 30            | 805.97 (+2)                  | 1609.74              |
| HG.29         | GTSSQTVQGYPSVSSPQQGPY                   | 30            | 1160.03 (+2)                 | 2317.06              |
| HG.30         | HQSGQGQQGYPSSL                          | 29            | 818.88 (+2)                  | 1635.74              |
| HG.31         | EQQPVVPSKAGSFYPSETTPSQQL                | 26            | 1303.66 (+2)                 | 2604.28              |
| HG.32         | YPSITSPQVSY                             | 25            | 686.69 (+2)                  | 1368.66              |
| HG.33         | KACQQVMDQQLRDISPECHPVVSPVAGQY           | 25            | 1108.59 (+3)                 | 3324.61              |
| HG.34         | QQSGGQHGYYPTSPQLSGGQQRPGQW              | 23            | 986.61 (+3)                  | 2956.37              |
| HG.35         | YPGQASPQQPGQGQQPGKW                     | 22            | 1020.20 (+2)                 | 2037.97              |
| HG.36         | EQTVVPPKGGSFYPGETTPL                    | 20            | 702.39 (+3)                  | 2103.06              |
| HG.37         | EQQIVVPPKGGSFYPGETTTPPQQL               | 20            | 866.87 (+3)                  | 2596.32              |
| HG.38         | QQSGQGQQGYPTSPQQSGQGQQPGQW              | 19            | 979.64 (+3)                  | 2934.30              |
| HG.39         | QQSGQGQQGHYPTSLQQPGQGQQGHY              | 18            | 942.45 (+3)                  | 2823.28              |
| HG.40         | LQPGQGQQGYPTSPQQPGQGQQ                  | 16            | 863.56 (+3)                  | 2584.24              |

| <b>ω5-gliadins</b>   |                                   |    |              |         |
|----------------------|-----------------------------------|----|--------------|---------|
| ω5.1                 | QQYPQQQPSGSDVISISGL               | 53 | 677.95 (+3)  | 2031.00 |
| ω5.2                 | QQYPQQQPSGSNVISISGL               | 33 | 677.95 (+3)  | 2030.01 |
| ω5.3                 | QTPQEQQFPQEQQFPEPQQILQQQF         | 33 | 948.38 (+3)  | 2842.36 |
| ω5.4                 | SPRGMELQTPQEQQFPQEQQFPEPQQILQQQF  | 32 | 1205.20 (+3) | 3612.74 |
| ω5.5                 | SPRGMELQTPQEQQFPQEQQFPEPQQIL      | 27 | 1028.40 (+3) | 3081.49 |
| ω5.6                 | HQQQLPQQQFPQQQFPQQQFPQQQFPQQQQL   | 15 | 1340.10 (+3) | 4015.95 |
| <b>ω1,2-gliadins</b> |                                   |    |              |         |
| wg.1                 | ARELNPSNKEQLSPQQSF                | 53 | 1036.76 (+2) | 2072.04 |
| wg+ws.1              | GQQPEQIISQRPQQPFPLQPQQQF          | 50 | 950.27 (+3)  | 2846.45 |
| wg.2                 | GSSLTSIGGQ                        | 48 | 453.58 (+2)  | 905.45  |
| wg+ws.2              | GEQPEQIISQRPQQPFPLQPQQPF          | 44 | 939.61 (+3)  | 2816.43 |
| wg+ws.3              | AQQPEQIISQQPFLQPQQPF              | 43 | 1224.98 (+2) | 2448.25 |
| wg+ws.4              | AQQPEQLISQQPFLQPQQPF              | 43 | 1224.98 (+2) | 2448.25 |
| wg.3                 | QQPQQQL                           | 42 | 435.11 (+2)  | 868.45  |
| wg+ws.5              | GQQPEQIISQRPQQPFPLQPKQPF          | 39 | 939.77 (+3)  | 2815.48 |
| wg+ws.6              | GQQPEQIISQRPQQPFPLQPQQPF          | 37 | 1408.84 (+2) | 2815.45 |
| wg.4                 | LRQSQQPF                          | 36 | 502.16 (+2)  | 1002.53 |
| wg+ws.7              | GQQPMQIISQRPQQPFPLQPQQPF          | 34 | 938.83 (+3)  | 2817.45 |
| wg.5                 | AQQPEQIISHQPFPLQPQQPF             | 33 | 820.08 (+3)  | 2457.25 |
| wg+ws.8              | SLQPQQPVPQQPQRPF                  | 32 | 937.78 (+2)  | 1873.99 |
| wg+ws.9              | SQPQQPFPQQPGQIIEPQQPSPLQPQQPF     | 30 | 1173.74 (+3) | 3518.77 |
| wg.6                 | YQPQQPFPQQPGQIIPQQPQQPSPLQPQQPF   | 29 | 1199.47 (+3) | 3593.81 |
| wg.7                 | FPHQSQQPF                         | 26 | 558.10 (+2)  | 1114.53 |
| wg.8                 | SQQPQRPPQQPFPQQPQQIIPPQPQQPF      | 23 | 1064.69 (+2) | 3191.63 |
| wg.9                 | SQPQQPF                           | 23 | 831.70 (+1)  | 830.40  |
| wg.10                | LQQPQQPSPQPQQVVQIIPQQPQQPFPL      | 22 | 1072.63 (+3) | 3215.72 |
| wg.11                | GRQPEQIISQRPQQPFPLQPQQPF          | 22 | 950.27 (+3)  | 2843.49 |
| wg+ws.10             | SQPQQPFPQQPGQIIPQQPQQPSPLQPQQPF   | 18 | 1173.74 (+3) | 3517.78 |
| wg+ws.11             | SQPQQPFPQQPGQIIPKQPQQPSPLQPQQPF   | 17 | 1173.95 (+3) | 3517.82 |
| wg+ws.12             | GQQPEQIISRRPQQPFPLQPQQPF          | 17 | 949.97 (+3)  | 2843.49 |
| wg.12                | SQQPEQTISQQPQQPFPQQPHQPQQPYPQQQPY | 15 | 1314.06 (+3) | 3939.86 |
| <b>α-gliadins</b>    |                                   |    |              |         |
| α.1                  | GSSQVLQQSTY                       | 63 | 599.15 (+2)  | 1196.57 |
| α.2                  | FQPSQQNPQAQGF                     | 57 | 738.70 (+2)  | 1475.69 |
| α.3                  | RQQQKQQQQPSSQVSF                  | 56 | 644.59 (+3)  | 1930.97 |
| α.4                  | LQLQFPQPQLPYPQPQPF                | 52 | 784.80 (+2)  | 2262.19 |
| α.5                  | LQLQFPQPQLPY                      | 52 | 784.80 (+2)  | 1567.85 |
| α.6                  | RPQQPYPQPQPY                      | 45 | 813.71 (+2)  | 1625.80 |
| α.7                  | LQLQFPQPQLPYPQPQLPYPQPQPF         | 45 | 1029.75 (+3) | 3085.61 |
| α.8                  | QQPQQQYPLGQGSF                    | 39 | 803.16 (+2)  | 1604.77 |
| α.9                  | MQLQFPQPQLPYPQPQLPYPQPQPF         | 37 | 1035.76 (+3) | 3103.57 |
| α.10                 | QQPQQQYPSGQGF                     | 36 | 746.68 (+2)  | 1491.68 |
| α.11                 | LGQQQFPFPQQPYPQPQPFPSQQPY         | 35 | 974.63 (+3)  | 2921.42 |
| α.12                 | IGQQQFPFPQQPYPQPQPFPSQQPY         | 35 | 974.63 (+3)  | 2921.42 |
| α.13                 | LGQEQQFPFPQQPYPQPQPFPSQQPY        | 33 | 974.63 (+3)  | 2922.41 |
| α.14                 | VQQQQFPGRQQPFAPQQPYPQPQPFPSQQPY   | 31 | 1222.66 (+3) | 3665.79 |
| α.15                 | RGQQQFPFPQQPYPQPQPFPSQQPY         | 30 | 988.86 (+3)  | 2964.44 |
| α.16                 | LGQQQFPFTPQQPYPQPQPFPSQQPY        | 28 | 974.63 (+3)  | 2925.42 |
| α.17                 | HQQRQQPSSQVSF                     | 27 | 519.53 (+3)  | 1555.75 |

|                                 |                                |    |              |         |
|---------------------------------|--------------------------------|----|--------------|---------|
| α.18                            | LQLQFPQPQLPYQPQLPYQPQLPYQPQPF  | 27 | 1304.40 (+3) | 3909.04 |
| α.19                            | LGQQQTFPPQQYPQPQPFPSQQPY       | 26 | 974.63 (+3)  | 2925.42 |
| α.20                            | VRVPVQLQPQNPSQQQPQEQVPL        | 26 | 912.53 (+3)  | 2733.46 |
| α.21                            | VQQQQFVGQQQFPFPQQYPQPQPFPSQQPY | 25 | 1222.27 (+3) | 3665.78 |
| α.22                            | QQPQQYPSGQGFQPSQQNPQAQGF       | 23 | 984.15 (+3)  | 2949.35 |
| α.23                            | LGQQQQFPGQQQFPFPQQYPQPQPF      | 23 | 1054.99 (+3) | 3162.54 |
| α.24                            | VQEQQFPGQQQFPFPQQYPQPQPFPSQQPY | 23 | 1222.33 (+3) | 3664.74 |
| α.25                            | QQPQQYPSGQGSFQPSQQNPQAQGF      | 23 | 964.16 (+3)  | 2889.31 |
| α.26                            | NGQQQFPFPQQYPQPQPFPSQQPY       | 22 | 974.96 (+3)  | 2922.38 |
| α.27                            | LGQQQFPFPQQYPQPQFPSQLPYL       | 21 | 974.63 (+3)  | 2922.48 |
| α.28                            | VQQQQFPGQQQFPFPQQYPQPQPFPSQQPY | 20 | 1222.27 (+3) | 3663.76 |
| α.29                            | LQLQFPQPQLPYPHPQLPYQPQPF       | 21 | 1032.72 (+3) | 3094.61 |
| α.30                            | VRVTVQLQPQNPSQQQPQEQVPL        | 16 | 912.53 (+3)  | 2737.46 |
| α.31                            | LQLQFPQTQLPY                   | 15 | 784.89 (+2)  | 1571.84 |
| <b>LMW-GS within α-gliadins</b> |                                |    |              |         |
| LG.1                            | SHHQQQPIQQQPQPF                | 56 | 652.53 (+3)  | 1954.95 |
| LG.2                            | SQQQQIVL                       | 31 | 943.20 (+1)  | 942.52  |
| LG.3                            | VLPQQQIPF                      | 29 | 535.17 (+2)  | 1068.60 |
| LG.4                            | GVGTGVGSY                      | 20 | 796.13 (+1)  | 795.38  |
| <b>γ-gliadins</b>               |                                |    |              |         |
| yg.1                            | LQPQQPQQSFPQQQQPL              | 67 | 1010.32 (+2) | 2019.02 |
| yg.2                            | NIQVDPSGQVQW                   | 54 | 685.74 (+2)  | 1369.67 |
| yg.3                            | QLVQGGIIPQQAQY                 | 48 | 632.75 (+3)  | 1895.00 |
| yg.4                            | ANIDAGIGGQ                     | 45 | 915.29 (+1)  | 914.45  |
| yg.5                            | FQLVQGGIIPQQAQY                | 43 | 681.65 (+3)  | 2042.07 |
| yg.6                            | ASIVAGIGGQ                     | 42 | 436.72 (+2)  | 871.48  |
| yg.7                            | SQQPQQAF                       | 42 | 467.13 (+2)  | 932.44  |
| yg.8                            | NIQVDPSGQVQWPQQPFPQPQPF        | 42 | 930.65 (+3)  | 2789.36 |
| yg.9                            | SQQQQVGGSLVQGGIIPQQAQY         | 38 | 915.95 (+3)  | 2744.43 |
| yg.10                           | QVQWPQQPFPQPQPF                | 29 | 1054.77 (+2) | 2107.03 |
| yg.11                           | RQPQQPF                        | 25 | 450.64 (+2)  | 899.47  |
| <b>LMW-GS within γ-gliadins</b> |                                |    |              |         |
| LG.1                            | SHHQQQPIQQQPQPF                | 56 | 652.45 (+3)  | 1954.95 |
| LG.2                            | SQQQQIVL                       | 46 | 943.45 (+1)  | 942.52  |
| LG.3                            | VLPQQQIPF                      | 35 | 535.25 (+2)  | 1068.60 |
| <b>LMW-GS</b>                   |                                |    |              |         |
| LG.5                            | SIILQEQQGF                     | 68 | 645.90 (+2)  | 1289.67 |
| LG.6                            | QQQLGKQPQQQL                   | 65 | 776.36 (+2)  | 1550.82 |
| LG.7                            | QQQLGQQPQQKL                   | 65 | 776.36 (+2)  | 1550.82 |
| LG.8                            | QQQLGQQPQQQL                   | 65 | 776.36 (+2)  | 1550.79 |
| LG.9                            | GQQPQQQQLAQGTF                 | 63 | 779.94 (+2)  | 1557.76 |
| LG.10                           | SIVLQEQQHGGQL                  | 61 | 718.92 (+2)  | 1435.75 |
| LG.11                           | SQQQPPFSQQQQQPL                | 56 | 885.31 (+2)  | 1767.86 |
| LG.1                            | SHHQQQPIQQQPQPF                | 56 | 652.80 (+3)  | 1954.95 |
| LG.12                           | QQPQQQLGQQPQQQQQQVL            | 55 | 754.33 (+3)  | 2259.14 |
| LG.13                           | SIVLQEQQHGGGF                  | 53 | 736.22 (+2)  | 1469.73 |
| LG.14                           | QQPQQQLGQQPQQQVQKGTG           | 51 | 1227.1 (+2)  | 2451.23 |
| LG.15                           | VQPQQQQPQQSVQGVY               | 50 | 921.88 (+2)  | 1842.91 |
| LG.16                           | GKQPQQQQL                      | 45 | 527.74 (+2)  | 1053.56 |
| LG.17                           | GQQPQQQKL                      | 45 | 527.74 (+2)  | 1053.56 |
| LG.18                           | GQQPQQQQL                      | 45 | 527.74 (+2)  | 1053.56 |
| LG.19                           | LQPHQIAQLEVMNSIAL              | 44 | 953.19 (+2)  | 1904.03 |

|                                 |                           |    |              |         |
|---------------------------------|---------------------------|----|--------------|---------|
| LG.20                           | SILVQEQQHGGGL             | 44 | 718.92 (+2)  | 1435.75 |
| LG.21                           | QQPQQQLGQQPQEQQVQQGTF     | 44 | 818.47 (+3)  | 2452.18 |
| LG.22                           | QQQPLPPQQTFFQQPL          | 41 | 938.44 (+2)  | 1873.98 |
| LG.23                           | SIILQQQQQQQQQQGQSIIQY     | 41 | 882.21 (+3)  | 2642.35 |
| LG.3                            | VLPQQQIPF                 | 37 | 535.31 (+2)  | 1068.60 |
| LG.24                           | SHIPGLERPSQQQPLPPQQL      | 37 | 784.65 (+3)  | 2350.25 |
| LG.25                           | SQQQQIPVIHPSVL            | 35 | 525.31 (+3)  | 1572.87 |
| LG.26                           | LQPHQIAQLEVMTSIAL         | 35 | 946.59 (+2)  | 1891.03 |
| LG.27                           | LQPHKIAQLEVMTSIAL         | 35 | 946.59 (+2)  | 1891.07 |
| LG.28                           | SQQQQPPFSQQQPPF           | 33 | 886.86 (+3)  | 1770.84 |
| LG.29                           | SQIPEQSRY                 | 33 | 554.28 (+2)  | 1106.54 |
| LG+B                            | LQPHQIAQL                 | 32 | 524.31 (+2)  | 1046.59 |
| LG.31                           | LQPHKIAQL                 | 32 | 524.31 (+2)  | 1046.63 |
| LG.32                           | DAIRAIY                   | 31 | 467.77 (+2)  | 933.53  |
| LG.33                           | EAIRAIIFSILQEQQGGF        | 27 | 735.84 (+3)  | 2203.21 |
| LG.34                           | SQHQQPVLPQQQIPY           | 26 | 895.07 (+2)  | 1789.92 |
| LG.35                           | IQVDPSGQVQWPQQQPPFPQQPF   | 25 | 978.39 (+3)  | 2931.44 |
| LG.36                           | SQQQPPFSQQQPPF            | 23 | 885.31 (+2)  | 1770.84 |
| LG.37                           | VQQQLPVVQPSIL             | 23 | 725.27 (+2)  | 1447.85 |
| LG.38                           | VQQQIPVVQPSIL             | 23 | 725.27 (+2)  | 1447.85 |
| LG.39                           | SIILQQQQQQQQQQGQSIIQY     | 23 | 1010.32 (+3) | 3026.52 |
| LG.40                           | TQQQPPFSQQPPISQQQQQQQQQPF | 22 | 1079.74 (+3) | 3234.55 |
| LG.41                           | SQQQPPFSQQQPPFSQQQQQL     | 19 | 1355.76 (+2) | 2708.30 |
| <b>α-gliadins within LMW-GS</b> |                           |    |              |         |
| α.32                            | QQQQQQQQQQQIL             | 78 | 827.72 (+2)  | 1652.83 |
| α.2                             | FQPSQQNPQAQGF             | 48 | 738.95 (+2)  | 1475.69 |
| α.33                            | VQPQQLPQFEEIRNL           | 41 | 920.46 (+2)  | 1837.98 |
| α.10                            | QQPQQQYPSGQGF             | 33 | 746.80 (+2)  | 1491.68 |
| α.34                            | QQPNIAHASSQVSQQSY         | 33 | 937.28 (+2)  | 1871.88 |
| α.35                            | QQPNIAHASSKVSQQSY         | 33 | 937.28 (+2)  | 1871.92 |
