# Supplementary material for: Isolation and characterization of gluten protein types from wheat, rye, barley and oats for use as reference materials
Source: PubMed Central journal article supplement (PMC5325591; doi:10.1371/journal.pone.0172819), 2017-02-24
Supplement: pone.0172819.s005.pdf [file pone.0172819.s005.pdf]

**S2 Table. Peptides identified in each isolated rye gluten protein type.** Peptide sequences, their scores, *m/z* ratios, charge states and relative molecular weights (*M<sub>r</sub>*). For corresponding protein sequences, see S6 Table.

| Abbreviation          | Gluten protein type<br>Peptide sequence | Peptide score | <i>m/z</i><br>(charge state) | <i>M<sub>r</sub></i> |
|-----------------------|-----------------------------------------|---------------|------------------------------|----------------------|
| <b>HMW-secalins</b>   |                                         |               |                              |                      |
| HS.1                  | QQPAQGQQGY                              | 58            | 634.16 (+2)                  | 1266.57              |
| HS.2                  | KGGSFYDDETSPPQQL                        | 56            | 875.79 (+2)                  | 1749.82              |
| HS.3                  | QQPGQGQQGY                              | 55            | 545.65 (+2)                  | 1089.50              |
| HS.4                  | QKPGQGQQGY                              | 53            | 545.63 (+2)                  | 1089.52              |
| HS.5                  | LQIGQGQQGY                              | 52            | 546.21 (+2)                  | 1090.55              |
| HS.6                  | QQPGQGQQGY                              | 52            | 627.18 (+2)                  | 1252.55              |
| HS.7                  | QKPGQGQQGY                              | 52            | 627.18 (+2)                  | 1252.59              |
| HS.8                  | KRYYPSTSPHQGSY                          | 51            | 590.52 (+3)                  | 1768.86              |
| HS.9                  | ITSPQQSGQGQQPGQW                        | 49            | 774.56 (+3)                  | 2321.09              |
| HG+HS.2               | HVSAEHQAASL                             | 48            | 575.11 (+2)                  | 1148.56              |
| HS.10                 | YITSPQQSGQGQQPGQW                       | 47            | 828.82 (+3)                  | 2484.15              |
| HS.11                 | YPSVTSPHQGSY                            | 46            | 661.74 (+2)                  | 1321.60              |
| HS.12                 | LTSPQPGQGQQGYDSPY                       | 46            | 975.80 (+2)                  | 1949.88              |
| HS.13                 | YSTSPRQPGQGQQEYPTSPQPGQW                | 46            | 999.12 (+3)                  | 2994.36              |
| HS+D                  | KVAKAQQQL                               | 43            | 443.18 (+2)                  | 884.55               |
| HS.14                 | YPTSPQPGQGQQGY                          | 41            | 818.23 (+2)                  | 1634.74              |
| HS.15                 | QQLQQGIFW                               | 41            | 574.24 (+2)                  | 1146.59              |
| HS.16                 | QQPGQGQEGY                              | 39            | 545.63 (+2)                  | 1090.48              |
| HS.17                 | QQPAQGQQGY                              | 39            | 552.59 (+2)                  | 1103.51              |
| HS.18                 | YLTSPQPGQGQQGY                          | 39            | 826.28 (+2)                  | 1650.77              |
| HG+HS.3               | HVSVEHQAASL                             | 36            | 589.18 (+2)                  | 1176.60              |
| HS.19                 | QQPGQGQSGY                              | 35            | 525.14 (+2)                  | 1048.46              |
| HS.20                 | QEPGQGQQGY                              | 34            | 545.61 (+2)                  | 1090.47              |
| HS.21                 | LQIGQGQQGYPTSPQPGQGQQGY                 | 33            | 903.60 (+3)                  | 2707.27              |
| HS.22                 | STSPRQPGQGQQEYPTSPQPGQW                 | 31            | 1416.81 (+2)                 | 2831.30              |
| HS.23                 | KRYYPSTSPHQGSYYPGQTSL                   | 31            | 839.56 (+3)                  | 2516.22              |
| HS.24                 | STSPRQPGQGQQEY                          | 30            | 781.66 (+2)                  | 1561.72              |
| HS.25                 | EQTTVPPKGGSFYPSSETTPL                   | 29            | 712.57 (+3)                  | 2135.05              |
| HG+HS.1               | QQPGQGQQPGQW                            | 28            | 669.71 (+2)                  | 1337.62              |
| HS.26                 | YPTSPQPGQGQQPGQGQQGY                    | 28            | 1199.66 (+2)                 | 2394.07              |
| HS.27                 | LTSPQPGQGQQGY                           | 27            | 744.64 (+2)                  | 1487.71              |
| HS.28                 | STSLQPGQGQQGHYPTSL                      | 27            | 671.92 (+3)                  | 2012.96              |
| HS.29                 | YPSVTSPHQGSYYPGQTSL                     | 26            | 1034.71 (+2)                 | 2067.96              |
| HS.30                 | KGGSFYDDETSPPQQLQRIL                    | 25            | 797.43 (+3)                  | 2389.20              |
| HS.31                 | QQPGQVQPGYY                             | 18            | 632.69 (+2)                  | 1263.60              |
| <b>γ-75k-secalins</b> |                                         |               |                              |                      |
| γ75k.1                | QQFPQQPQQPFQQL                          | 68            | 968.26 (+2)                  | 1934.97              |
| γ75k.2                | AQVQGIHQPQQL                            | 61            | 661.83 (+2)                  | 1321.74              |
| γ75k.3                | SQLEVVRS                                | 59            | 515.71 (+2)                  | 1029.59              |
| γ75k.4                | QQHVGQGALAQQVQGIHQPQQL                  | 55            | 747.73 (+3)                  | 2240.21              |
| γ75k.5                | ASIVTGIVGH                              | 52            | 492.17 (+2)                  | 982.52               |
| γ75k.6                | ASIVTGIVGH                              | 50            | 477.25 (+2)                  | 952.54               |
| γ75k.7                | LPQSHKQHVGQGALAQQVQGIHQPQQL             | 46            | 934.84 (+3)                  | 2802.53              |
| γ75k.8                | QQHVGQGAL                               | 45            | 469.21 (+2)                  | 936.49               |
| γ75k.9                | LPQSHKQHVGQGALAQQVQGIHQPQQL             | 40            | 934.84 (+3)                  | 2802.50              |

|                                              |                                 |    |              |         |
|----------------------------------------------|---------------------------------|----|--------------|---------|
| γ75k.10                                      | AQIPQQ                          | 33 | 399.18 (+2)  | 796.45  |
| γ75k.11                                      | QQFPQQPQQSFPQQPQQPVPQQPL        | 24 | 943.73 (+3)  | 2827.41 |
| <b>ω-secalins</b>                            |                                 |    |              |         |
| ωg+ωs.1                                      | GQQPEQIISQRPQQPFPLQPQQQF        | 53 | 949.89 (+3)  | 2846.45 |
| ωg+ωs.5                                      | GQQPEQIISQRPQQPFPLQPKQPF        | 50 | 939.57 (+3)  | 2815.48 |
| ωg+ωs.2                                      | GEQPEQIISQRPQQPFPLQPQQPF        | 48 | 939.69 (+3)  | 2816.43 |
| ωg+ωs.6                                      | GQQPEQIISQRPQQPFPLQPQQPF        | 46 | 939.64 (+3)  | 2815.45 |
| ωg+ωs.8                                      | SLQPQQPVPQQPQRPF                | 44 | 625.60 (+3)  | 1873.99 |
| ωg+ωs.7                                      | GQQPMQIISQRPQQPFPLQPQQPF        | 43 | 939.58 (+3)  | 2817.45 |
| ωg+ωs.3                                      | AQQPEQIISQQPFPLQPQQPF           | 37 | 817.49 (+3)  | 2448.25 |
| ωg+ωs.4                                      | AQQPEQLISQQPFPLQPQQPF           | 35 | 1224.84 (+2) | 2448.25 |
| ωs.1                                         | GQQPWQIISQRPQQPFPLQPQQPF        | 36 | 959.80 (+3)  | 2873.48 |
| ωs.2                                         | AQQPEQLISQQPFPL                 | 36 | 862.85 (+2)  | 1722.90 |
| ωs.3                                         | RQLNPSEQEL                      | 32 | 607.22 (+2)  | 1212.62 |
| ωg+ωs.9                                      | SQPQQPFPQQPGQIIEQPQQPSPLQPQQPF  | 31 | 1173.89 (+3) | 3518.77 |
| ωs.4                                         | ISQQPFPLQPQQPF                  | 25 | 828.36 (+2)  | 1653.86 |
| ωg+ωs.10                                     | SQPQQPFPQQPGQIIPQQPQQPSPLQPQQPF | 25 | 1173.97 (+3) | 3517.78 |
| ωg+ωs.12                                     | GQQPEQIISRRPQQPFPLQPQQPF        | 21 | 949.89 (+3)  | 2843.49 |
| ωg+ωs.11                                     | SQPQQPFPQQPGQIIPKQPQQPSPLQPQQPF | 17 | 1173.95 (+3) | 3517.82 |
| ωs.5                                         | AQQPKQIISQQPFPLQPQQPF           | 17 | 1225.33 (+2) | 2447.30 |
| ωs.6                                         | QSPQQPVPKEQSYPPQQPYPSHQPFPTPQQY | 17 | 1180.05 (+3) | 3535.69 |
| <b>HMW-secalins within ω-secalins</b>        |                                 |    |              |         |
| HS.5                                         | LQIGQGQQGY                      | 56 | 546.21 (+2)  | 1090.55 |
| HG+HS.2                                      | HVSAEHQAASL                     | 40 | 575.28 (+2)  | 1148.56 |
| HS.12                                        | LTSPQQPGQGQQGYDSPY              | 39 | 975.77 (+2)  | 1949.88 |
| <b>γ-40k-secalins</b>                        |                                 |    |              |         |
| γ40k.1                                       | FQIVQGQSIIQQQPAQLEVIRSL         | 75 | 1312.48 (+2) | 2622.46 |
| γ40k.2                                       | FQIVQGQSIIQQQPAQL               | 70 | 963.82 (+2)  | 1925.08 |
| γ40k.3                                       | FKIVQGQSIIQQQPAQL               | 70 | 642.67 (+3)  | 1925.08 |
| γ40k.4                                       | FQIVQGKSIIQQQPAQL               | 70 | 642.67 (+3)  | 1925.08 |
| γ40k.5                                       | RPLFQIVQGQSIIQQQPAQL            | 66 | 765.32 (+3)  | 2291.28 |
| γ40k.6                                       | RPLFKIVQGQSIIQQQPAQL            | 66 | 1146.90 (+2) | 2291.32 |
| γ40k.7                                       | RPLFQIVQGKSIIQQQPAQL            | 66 | 1146.90 (+2) | 2291.32 |
| γ40k.8                                       | KIVQGQSIIQQQPAQL                | 60 | 889.82 (+2)  | 1778.01 |
| γ40k.9                                       | QIVQGQSIIQQQPAQL                | 60 | 889.83 (+2)  | 1777.98 |
| γ40k.10                                      | QIVQGKSIIQQQPAQL                | 60 | 889.82 (+2)  | 1778.01 |
| γ40k.11                                      | QIVQGQSIIQQQPAQLEVIRSL          | 52 | 826.31 (+3)  | 2475.39 |
| γ40k.12                                      | QIVQGQSIIQQQL                   | 42 | 741.79 (+2)  | 1481.83 |
| γ40k.13                                      | VRPDCSNIRTPF                    | 41 | 468.83 (+3)  | 1403.71 |
| γ40k.14                                      | IESSLQQQMNPKNF                  | 36 | 883.29 (+2)  | 1765.82 |
| γ40k.15                                      | IQSSLQQQMNPKNF                  | 23 | 883.23 (+2)  | 1764.84 |
| γ40k.16                                      | IKSSLQQQMNPKNF                  | 23 | 883.23 (+2)  | 1764.87 |
| <b>γ-75k-secalins within γ-40k- secalins</b> |                                 |    |              |         |
| γ75k.3                                       | SQLEVVRSL                       | 51 | 515.71 (+2)  | 1029.59 |
| γ75k.6                                       | ASIVTGIVGH                      | 45 | 477.17 (+2)  | 952.54  |
