# Supplementary material for: Isolation and characterization of gluten protein types from wheat, rye, barley and oats for use as reference materials
Source: PubMed Central journal article supplement (PMC5325591; doi:10.1371/journal.pone.0172819), 2017-02-24
Supplement: pone.0172819.s006.pdf [file pone.0172819.s006.pdf]

**S3 Table. Peptides identified in each isolated barley gluten protein type.** Peptide sequences, their scores, *m/z* ratios, charge states and relative molecular weights (*M<sub>r</sub>*). For corresponding protein sequences, see S7 Table.

| Abbreviation                          | Gluten protein type<br>Peptide sequence | Peptide score | <i>m/z</i><br>(charge state) | <i>M<sub>r</sub></i> |
|---------------------------------------|-----------------------------------------|---------------|------------------------------|----------------------|
| <b>D-hordeins</b>                     |                                         |               |                              |                      |
| D.1                                   | YYPDQTSSQQSW                            | 69            | 745.15 (+2)                  | 1488.62              |
| D.2                                   | LQPGQGQQGPY                             | 61            | 586.70 (+2)                  | 1171.57              |
| D.3                                   | TQQKPGQGYNPGGTSP                        | 55            | 863.26 (+2)                  | 1728.85              |
| HS+D                                  | KVAKAQQ                                 | 46            | 443.12 (+2)                  | 884.55               |
| D.4                                   | SQVVRQY                                 | 40            | 440.07 (+2)                  | 878.47               |
| D.5                                   | QSATSPQQPGQGQQQETYPYIATSPHQPGQW         | 21            | 1107.38 (+3)                 | 3318.54              |
| D.6                                   | QSATSPQQPGQGQQQEPYIATSPHQPGQW           | 19            | 1105.88 (+3)                 | 3314.54              |
| D.7                                   | GGGLTTEQPQGGKQPF                        | 17            | 801.17 (+2)                  | 1600.79              |
| D.8                                   | SYPSATFPQQPGQGQQGQGYYPGATSL             | 17            | 938.98 (+3)                  | 2814.30              |
| <b>C-hordeins</b>                     |                                         |               |                              |                      |
| C.1                                   | QPQQPFPQPQQPIAHQPQQPF                   | 57            | 822.88 (+3)                  | 2465.23              |
| C.2                                   | QPQQPFPQPQQPLPRPQQPFPW                  | 56            | 932.28 (+3)                  | 2793.42              |
| C.3                                   | QPQQPFPQPQQPFPLQPQQPFPW                 | 52            | 929.35 (+3)                  | 2784.39              |
| C.4                                   | LQQPYPQNPY                              | 49            | 624.21 (+2)                  | 1246.61              |
| C.5                                   | IIPQQPQQPLPLQPHQPY                      | 47            | 708.18 (+3)                  | 2121.14              |
| C.6                                   | IIPQQPQQPFPLQPHQPY                      | 41            | 719.37 (+3)                  | 2155.13              |
| C.7                                   | SFSQQPQQPFPL                            | 39            | 702.21 (+2)                  | 1402.70              |
| C.8                                   | RQLNPSSQEL                              | 39            | 586.17 (+2)                  | 1170.61              |
| C.9                                   | LPQQPFPVQQPF                            | 33            | 713.29 (+2)                  | 1424.75              |
| C.10                                  | LPQKFPVQQPF                             | 33            | 713.29 (+2)                  | 1424.79              |
| C.11                                  | SQQPQQPFPLQPQQPFPQQPQQPFPQQPQQIF        | 25            | 1309.13 (+3)                 | 3923.98              |
| <b>γ-hordeins within γ/B-hordeins</b> |                                         |               |                              |                      |
| yh.1                                  | VLPQQQAQF                               | 50            | 529.69 (+2)                  | 1057.56              |
| yh.2                                  | AQQQPSIEEQHQL                           | 50            | 767.98 (+2)                  | 1534.74              |
| yh.3                                  | TQQPYPQQQL                              | 40            | 664.12 (+2)                  | 1326.66              |
| yh.4                                  | QPQQQPFPQQKPF                           | 22            | 863.24 (+2)                  | 1724.87              |
| <b>B-hordeins within γ/B-hordeins</b> |                                         |               |                              |                      |
| B.1                                   | SIVLQEQPL                               | 65            | 513.66 (+2)                  | 1025.58              |
| B.2                                   | SIVLQEQSL                               | 62            | 508.66 (+2)                  | 1015.56              |
| B.3                                   | QQPQPQQLGQPQQVPQSVF                     | 57            | 1081.65 (+2)                 | 2161.10              |
| B.4                                   | QQPQPQQGQQQQVPQSVF                      | 55            | 1040.67 (+2)                 | 2079.02              |
| B.5                                   | SIVLQEQPQQL                             | 52            | 641.62 (+2)                  | 1281.70              |
| B.6                                   | LQEQQDQMLL                              | 49            | 623.19 (+2)                  | 1244.61              |
| B.7                                   | RIVPLAIDTRGV                            | 49            | 470.48 (+3)                  | 1407.86              |
| B.8                                   | QQPQPQQVGGQQQQVPQSAF                    | 46            | 717.64 (+3)                  | 2150.06              |
| B.9                                   | RGVGPSVGV                               | 41            | 414.15 (+2)                  | 826.47               |
| B.10                                  | RHEAVRAIVY                              | 40            | 607.20 (+2)                  | 1212.68              |
| B.11                                  | AIDTRGV                                 | 39            | 415.59 (+2)                  | 829.47               |
| B.12                                  | LQPHQLAQL                               | 39            | 524.15 (+2)                  | 1046.59              |
| LG+B                                  | LQPHQIAQL                               | 39            | 524.15 (+2)                  | 1046.59              |
| B.13                                  | VQVQIPF                                 | 33            | 415.64 (+2)                  | 829.47               |
| B.14                                  | RHEAIRAIVY                              | 31            | 614.23 (+2)                  | 1226.70              |
| B.15                                  | GIDTRGV                                 | 24            | 408.60 (+2)                  | 815.46               |
| B.16                                  | LQLQIQY                                 | 22            | 904.77 (+1)                  | 904.51               |

|                                                                           |                      |    |              |         |
|---------------------------------------------------------------------------|----------------------|----|--------------|---------|
| B.17                                                                      | LQPHQIAQLEATTSIAL    | 19 | 917.59 (+2)  | 1833.01 |
| B.18                                                                      | RILRGVGPSVGV         | 17 | 605.25 (+2)  | 1208.74 |
| B.19                                                                      | FQQPQPQQLGQPQQVPQSVF | 15 | 770.44 (+3)  | 2308.17 |
| <b>B-hordeins within B/<math>\gamma</math>-hordeins</b>                   |                      |    |              |         |
| B.2                                                                       | SIVLQEQSL            | 69 | 508.66 (+2)  | 1015.56 |
| B.4                                                                       | QQPQPQQGQQQQVPQSVF   | 57 | 1040.32 (+2) | 2079.02 |
| B.7                                                                       | RIVPLAIDTRVGV        | 51 | 470.22 (+3)  | 1407.86 |
| B.1                                                                       | SIVLQEQPL            | 50 | 513.67 (+2)  | 1025.58 |
| B.3                                                                       | QQPQPQQLGQPQQVPQSVF  | 47 | 1081.31 (+2) | 2161.10 |
| B.8                                                                       | QQPQPQQVGQQQQVPQSAF  | 44 | 1076.23 (+2) | 2150.06 |
| B.10                                                                      | RHEAVRAIVY           | 41 | 607.15 (+2)  | 1212.68 |
| B.9                                                                       | RGVGPSVGV            | 40 | 414.09 (+2)  | 826.47  |
| B.11                                                                      | AIDTRVGV             | 37 | 415.61 (+2)  | 829.47  |
| B.14                                                                      | RHEAIRAIVY           | 37 | 409.79 (+3)  | 1226.34 |
| LG+B                                                                      | LQPHQIAQL            | 33 | 524.17 (+2)  | 1046.59 |
| B.13                                                                      | VQVQIPF              | 33 | 415.64 (+2)  | 829.47  |
| B.18                                                                      | RILRGVGPSVGV         | 27 | 605.18 (+2)  | 1208.74 |
| B.20                                                                      | VLQQQCCQQLPQIQEQF    | 15 | 1014.30 (+2) | 2028.98 |
| <b><math>\gamma</math>-hordeins within B/<math>\gamma</math>-hordeins</b> |                      |    |              |         |
| $\gamma$ h.2                                                              | AQQQPSIEEQHQL        | 44 | 768.22 (+2)  | 1534.74 |
| $\gamma$ h.3                                                              | TQQPYPQQQPL          | 20 | 665.16 (+2)  | 1326.66 |
