# Supplementary material for: Isolation and characterization of gluten protein types from wheat, rye, barley and oats for use as reference materials
Source: PubMed Central journal article supplement (PMC5325591; doi:10.1371/journal.pone.0172819), 2017-02-24
Supplement: pone.0172819.s007.pdf [file pone.0172819.s007.pdf]

**S4 Table. Peptides identified in the oat avenin fraction.** Peptide sequences, their scores,  $m/z$  ratios, charge states and relative molecular weights ( $M_r$ ). For corresponding protein sequences, see S8 Table.

| Abbreviation   | Gluten protein type<br>Peptide sequence | Peptide score | $m/z$<br>(charge state) | $M_r$   |
|----------------|-----------------------------------------|---------------|-------------------------|---------|
| <b>avenins</b> |                                         |               |                         |         |
| A.1            | LQPQLQQQIVQTQL                          | 79            | 832.90 (+2)             | 1663.93 |
| A.2            | QQQQQQQQF                               | 71            | 595.57 (+2)             | 1189.55 |
| A.3            | VQQQPPFVQQEQPF                          | 69            | 850.43 (+2)             | 1698.84 |
| A.4            | QTQMGGQIEGMRAF                          | 59            | 812.78 (+2)             | 1623.76 |
| A.5            | IQPQLQQQVF                              | 58            | 613.70 (+2)             | 1227.67 |
| A.6            | VQQQQQQQQQQQQPF                         | 56            | 949.73 (+2)             | 1897.91 |
| A.7            | LQPQLQQQML                              | 56            | 613.70 (+2)             | 1225.66 |
| A.8            | FQPQLQQQVF                              | 54            | 631.73 (+2)             | 1261.65 |
| A.9            | QAQLQQQLL                               | 52            | 535.24 (+2)             | 1068.60 |
| A.10           | LQPQVQQQL                               | 51            | 541.16 (+2)             | 1080.60 |
| A.11           | LQPQLQQQL                               | 50            | 548.20 (+2)             | 1094.62 |
| A.12           | NQPQQQAQF                               | 47            | 544.64 (+2)             | 1087.51 |
| A.13           | QPQLLQQQVF                              | 47            | 678.73 (+2)             | 1355.73 |
| A.14           | QQQQQQQF                                | 46            | 531.64 (+2)             | 1061.50 |
| A.15           | QQQAQVQQQVF                             | 45            | 666.10 (+2)             | 1330.67 |
| A.16           | LQPQLQQQIL                              | 44            | 604.60 (+2)             | 1207.70 |
| A.17           | FQPQMQQQF                               | 44            | 591.10 (+2)             | 1180.54 |
| A.18           | QLQLQQQAQVQQQVF                         | 44            | 907.21 (+2)             | 1812.96 |
| A.19           | NQPQMGGQIEGMRAF                         | 44            | 867.87 (+2)             | 1733.81 |
| A.20           | QPQLQQQVF                               | 43            | 558.19 (+2)             | 1114.58 |
| A.21           | VQQQQPF                                 | 41            | 437.58 (+2)             | 873.44  |
| A.22           | IQPQLQQVF                               | 41            | 550.29 (+2)             | 1099.61 |
| A.23           | QPQQQAQF                                | 39            | 487.62 (+2)             | 973.47  |
| A.24           | QQQLLQPQVQQQL                           | 37            | 789.69 (+2)             | 1577.86 |
| A.25           | TTTVQYDPSEYQPYPEQQEPF                   | 37            | 892.20 (+3)             | 2674.18 |
| A.26           | VQQQQQQQPF                              | 35            | 629.77 (+2)             | 1257.62 |
| A.27           | NPSEYQPYPEQQEPF                         | 35            | 991.14 (+2)             | 1979.86 |
| A.28           | QTQLQQQML                               | 32            | 559.23 (+2)             | 1116.57 |
| A.29           | QKLQQQLL                                | 31            | 499.53 (+2)             | 997.60  |
| A.30           | VQQQQMF                                 | 30            | 454.64 (+2)             | 907.43  |
| A.31           | QQQLIQPQLQQVF                           | 27            | 799.36 (+2)             | 1596.87 |
| A.32           | FQPQMQQVQTQGIF                          | 27            | 776.68 (+2)             | 1550.76 |
| A.33           | QPPLQQQL                                | 27            | 956.26 (+1)             | 950.53  |
| A.34           | DPSEYQPYPEQQEPF                         | 26            | 991.14 (+2)             | 1980.85 |
| A.35           | IPPQLQQVF                               | 25            | 1069.41 (+1)            | 1068.60 |
| A.36           | LQPQVQQQLQQQL                           | 22            | 789.13 (+2)             | 1577.86 |
| A.37           | TTTVQYNPSEYQPYPEQQEPF                   | 18            | 892.20 (+3)             | 2673.19 |
