# Supplementary material for: Isolation and characterization of gluten protein types from wheat, rye, barley and oats for use as reference materials
Source: PubMed Central journal article supplement (PMC5325591; doi:10.1371/journal.pone.0172819), 2017-02-24
Supplement: pone.0172819.s008.pdf [file pone.0172819.s008.pdf]

**S5 Table. Protein sequences (protein score > 63) identified in each isolated wheat gluten protein type (GPT).** The isolated wheat GPT were digested with chymotrypsin, analyzed by untargeted LC-MS/MS and the MS/MS files searched using the Mascot software and the NCBI Protein database (taxonomy *Viridiplantae*).

| Protein type<br>(number of hits)<br>NCBI Accession | Protein score | Protein name                                | Organism                                    | Number of peptide sequences |
|----------------------------------------------------|---------------|---------------------------------------------|---------------------------------------------|-----------------------------|
| <b>HMW-GS (64)</b>                                 |               |                                             |                                             |                             |
| AGH32931.1                                         | 646           | High molecular weight glutenin subunit 1Dx  | <i>T. spelta</i>                            | 17                          |
| CAI72574.1                                         | 644           | HMW subunit of glutenin 1Dx2.2*             | <i>T. aestivum</i>                          | 17                          |
| AFP58009.1                                         | 644           | High-molecular-weight glutenin 1Dx2.2       | <i>T. aestivum</i>                          | 17                          |
| AEO45112.2                                         | 643           | High-molecular-weight glutenin subunit      | <i>T. aestivum</i>                          | 17                          |
| BAG12019.2                                         | 642           | High-molecular-weight glutenin subunit 2.6  | <i>T. aestivum</i>                          | 17                          |
| AHN66476.1                                         | 642           | High molecular weight glutenin subunit Dx5  | <i>T. aestivum</i>                          | 17                          |
| ABX89297.1                                         | 610           | High molecular weight glutenin subunit      | <i>T. aestivum</i>                          | 16                          |
| AGH32939.1                                         | 610           | High molecular weight glutenin subunit 1Dx  | <i>Ae. tauschii</i>                         | 16                          |
| AGH32941.1                                         | 610           | High molecular weight glutenin subunit 1Dx  | <i>T. spelta</i>                            | 16                          |
| ABF14403.1                                         | 604           | 1Dx high molecular weight glutenin subunit  | <i>Th. ponticum</i> ×<br><i>T. aestivum</i> | 16                          |
| BAH37041.1                                         | 601           | High-molecular-weight glutenin subunit x5   | <i>T. aestivum</i>                          | 16                          |
| P10388.5                                           | 601           | Glutenin, high molecular weight subunit DX5 | <i>T. aestivum</i>                          | 16                          |
| AGH32922.1                                         | 601           | High molecular weight glutenin subunit 1Dx  | <i>T. spelta</i>                            | 16                          |
| AGH32923.1                                         | 601           | High molecular weight glutenin subunit 1Dx  | <i>T. spelta</i>                            | 16                          |
| AGH32924.1                                         | 601           | High molecular weight glutenin subunit 1Dx  | <i>T. spelta</i>                            | 16                          |
| AGH32925.1                                         | 601           | High molecular weight glutenin subunit 1Dx  | <i>T. spelta</i>                            | 16                          |
| AGH32926.1                                         | 601           | High molecular weight glutenin subunit 1Dx  | <i>T. spelta</i>                            | 16                          |
| AGH32927.1                                         | 601           | High molecular weight glutenin subunit 1Dx  | <i>T. spelta</i>                            | 16                          |
| AGH32928.1                                         | 600           | High molecular weight glutenin subunit 1Dx  | <i>T. spelta</i>                            | 16                          |
| AGH32929.1                                         | 600           | High molecular weight glutenin subunit 1Dx  | <i>T. spelta</i>                            | 16                          |
| ADY38693.1                                         | 353           | High-molecular-weight glutenin subunit      | <i>S. cereale</i> ×<br><i>T. aestivum</i>   | 8                           |
| ADY38694.1                                         | 353           | High-molecular-weight glutenin subunit      | <i>S. cereale</i> ×<br><i>T. aestivum</i>   | 8                           |

|            |     |                                                    |                                                  |   |
|------------|-----|----------------------------------------------------|--------------------------------------------------|---|
| ADY38695.1 | 353 | High-molecular-weight glutenin subunit             | <i>S. cereale</i> ×<br><i>T. aestivum</i>        | 8 |
| ADY38712.1 | 353 | High-molecular-weight glutenin subunit             | <i>S. cereale</i> ×<br><i>T. aestivum</i>        | 8 |
| AEO19857.1 | 352 | High-molecular-weight glutenin subunit             | <i>T. aestivum</i>                               | 8 |
| ADY38698.1 | 351 | High-molecular-weight glutenin subunit             | <i>S. cereale</i> ×<br><i>T. aestivum</i>        | 8 |
| ADY38699.1 | 351 | High-molecular-weight glutenin subunit             | <i>S. cereale</i> ×<br><i>T. aestivum</i>        | 8 |
| ADY38717.1 | 351 | High-molecular-weight glutenin subunit             | <i>S. cereale</i> ×<br><i>T. aestivum</i>        | 8 |
| CAA43331.1 | 350 | High-molecular-weight glutenin subunit 1Ax1        | <i>T. aestivum</i>                               | 8 |
| ADY38692.1 | 350 | High-molecular-weight glutenin subunit             | <i>S. cereale</i> ×<br><i>T. aestivum</i>        | 8 |
| AHZ62762.1 | 350 | High-molecular-weight glutenin subunit 1Ax1        | <i>T. aestivum</i>                               | 8 |
| ADY38715.1 | 349 | High-molecular-weight glutenin subunit             | <i>S. cereale</i> ×<br><i>T. aestivum</i>        | 8 |
| CAA43361.1 | 293 | HMW glutenin subunit 1By9                          | <i>T. aestivum</i>                               | 9 |
| AGZ95069.1 | 293 | High molecular weight glutenin subunit By18        | <i>T. aestivum</i>                               | 9 |
| AHI62991.1 | 293 | High molecular weight glutenin subunit             | <i>T. aestivum</i>                               | 9 |
| CAC40687.1 | 290 | High molecular weight glutenin subunit y           | <i>T. aestivum</i>                               | 9 |
| AAO64642.1 | 290 | HMW glutenin subunit                               | <i>T. turgidum</i><br><i>ssp. durum</i>          | 9 |
| ABG68035.1 | 290 | Y-type HMW glutenin                                | <i>T. aestivum</i>                               | 9 |
| AAQ93633.1 | 283 | HMW-glutenin By subunit                            | <i>T. turgidum</i>                               | 9 |
| AHC72163.1 | 280 | High molecular weight glutenin subunit 1By protein | <i>T. dicoccoides</i>                            | 9 |
| ABF82252.1 | 169 | High molecular weight glutenin subunit             | <i>T. aestivum</i>                               | 4 |
| BAN82580.1 | 169 | High-molecular-weight glutenin subunit             | <i>T. aestivum</i>                               | 4 |
| ACJ76973.1 | 164 | High molecular weight glutenin x-type              | <i>T. monococcum</i><br><i>ssp. aegilopoides</i> | 4 |
| AEK20782.1 | 164 | High molecular weight glutenin 1Ax2.1              | <i>T. monococcum</i><br><i>ssp. monococcum</i>   | 4 |
| ACJ76970.1 | 164 | High molecular weight glutenin x-type              | <i>T. monococcum</i>                             | 4 |
| ABK54365.1 | 147 | High molecular weight glutenin subunit             | <i>T. aestivum</i>                               | 3 |
| AAU04841.1 | 139 | High molecular weight glutenin subunit 1Dy10.1     | <i>T. aestivum</i>                               | 6 |
| ABO86195.1 | 139 | Dy-type high molecular weight subunit protein      | <i>T. aestivum</i>                               | 6 |
| P10387.1   | 138 | Glutenin, high molecular weight subunit DY10       | <i>T. aestivum</i>                               | 6 |

|                           |     |                                                    |                                               |   |
|---------------------------|-----|----------------------------------------------------|-----------------------------------------------|---|
| P08488.1                  | 138 | Glutenin, high molecular weight subunit 12         | <i>T. aestivum</i>                            | 6 |
| AAR29050.1                | 138 | HMW glutenin subunit                               | <i>T. aestivum</i>                            | 6 |
| AAR29051.1                | 138 | HMW glutenin subunit                               | <i>T. aestivum</i>                            | 6 |
| ABF14404.1                | 138 | 1Dy high molecular weight glutenin subunit         | <i>Th. ponticum</i> ×<br><i>T. aestivum</i>   | 6 |
| ABX64443.1                | 138 | High molecular weight glutenin subunit             | <i>T. aestivum</i>                            | 6 |
| BAF96643.1                | 138 | High-molecular-weight glutenin subunit y10         | <i>T. aestivum</i>                            | 6 |
| ACO56367.1                | 138 | HMW glutenin subunit                               | <i>T. aestivum</i>                            | 6 |
| AHC72161.1                | 138 | High molecular weight glutenin subunit 1Dy protein | <i>T. aestivum</i>                            | 6 |
| CAA32115.1                | 135 | Unnamed protein product                            | <i>T. aestivum</i>                            | 3 |
| ABF14402.1                | 135 | 1Bx high molecular weight glutenin subunit         | <i>T. aestivum</i>                            | 3 |
| BAE96560.1                | 135 | High-molecular-weight glutenin subunit Bx17        | <i>T. aestivum</i>                            | 3 |
| ABX89298.1                | 135 | High molecular weight glutenin subunit             | <i>T. aestivum</i>                            | 3 |
| AHC72166.1                | 135 | High molecular weight glutenin subunit 1Bx protein | <i>T. aestivum</i> ×<br><i>T. dicoccoides</i> | 3 |
| AAQ93629.1                | 118 | HMW-glutenin Bx subunit                            | <i>T. turgidum</i>                            | 3 |
| AID62092.2                | 117 | HMW-GS protein                                     | <i>T. dicoccoides</i>                         | 3 |
| <b>ω5-gliadins (12)</b>   |     |                                                    |                                               |   |
| AI26682.1                 | 91  | Fast omega-gliadin                                 | <i>T. monococcum</i>                          | 3 |
| AI26683.1                 | 91  | Fast omega-gliadin                                 | <i>T. monococcum</i>                          | 3 |
| AIU64833.1                | 91  | Omega gliadin                                      | <i>T. monococcum</i>                          | 3 |
| AIU64834.1                | 91  | Omega gliadin                                      | <i>T. monococcum</i>                          | 3 |
| AIU64840.1                | 91  | Omega gliadin                                      | <i>T. monococcum</i>                          | 3 |
| BAE20328.1                | 67  | Omega-5 gliadin                                    | <i>T. aestivum</i>                            | 2 |
| AJG03078.1                | 67  | Omega-gliadin                                      | <i>T. aestivum</i>                            | 2 |
| AJG03093.1                | 67  | Omega-gliadin                                      | <i>T. aestivum</i>                            | 2 |
| AJG03094.1                | 67  | Omega-gliadin                                      | <i>T. aestivum</i>                            | 2 |
| AKA88509.1                | 67  | Fast omega-gliadin                                 | <i>T. dicoccoides</i>                         | 2 |
| AKA88506.1                | 64  | Fast omega-gliadin                                 | <i>T. dicoccoides</i>                         | 1 |
| AKA88508.1                | 64  | Fast omega-gliadin                                 | <i>T. dicoccoides</i>                         | 1 |
| <b>ω1,2-gliadins (25)</b> |     |                                                    |                                               |   |
| BAN29067.1                | 162 | Omega-gliadin, partial                             | <i>T. aestivum</i>                            | 4 |
| ACQ83639.1                | 106 | Omega secalin                                      | <i>T. aestivum</i>                            | 3 |
| ACN96903.1                | 102 | Putative omega secalin                             | <i>T. aestivum</i>                            | 3 |
| ACN62213.1                | 98  | Omega-gliadin, partial                             | <i>T. aestivum</i>                            | 3 |
| ACQ83634.1                | 96  | Omega secalin                                      | <i>S. cereale</i> ×<br><i>T. aestivum</i>     | 3 |
| ACQ83640.1                | 96  | Omega secalin                                      | <i>T. aestivum</i>                            | 3 |
| ACQ83637.1                | 96  | Omega secalin                                      | <i>T. aestivum</i>                            | 3 |
| ACQ83635.1                | 96  | Omega secalin                                      | <i>S. cereale</i> ×<br><i>T. aestivum</i>     | 3 |
| ACQ83642.1                | 95  | Omega secalin                                      | <i>T. aestivum</i>                            | 3 |
| CAA42836.1                | 94  | Sec1 precursor                                     | <i>S. cereale</i>                             | 3 |
| ACQ83629.1                | 94  | Omega secalin                                      | <i>S. cereale</i> ×<br><i>T. turgidum</i>     | 3 |

|                        |     |                               |                                                                |   |
|------------------------|-----|-------------------------------|----------------------------------------------------------------|---|
| ACQ83631.1             | 94  | Omega secalin                 | <i>S. cereale</i> ×<br><i>T. turgidum</i> ssp.<br><i>durum</i> | 3 |
| ACN62214.1             | 94  | Omega-gliadin, partial        | <i>T. aestivum</i>                                             | 3 |
| ACQ83638.1             | 93  | Omega secalin                 | <i>T. aestivum</i>                                             | 3 |
| ACN96900.1             | 93  | Putative omega secalin        | <i>T. aestivum</i>                                             | 3 |
| ACQ83626.1             | 89  | Omega secalin                 | <i>S. cereale</i>                                              | 3 |
| ADF58078.1             | 86  | Omega-gliadin, partial        | <i>T. urartu</i>                                               | 3 |
| ADF58069.1             | 81  | Omega-gliadin, partial        | <i>T. monococcum</i>                                           | 3 |
| ADF58072.1             | 81  | Omega-gliadin, partial        | <i>T. monococcum</i>                                           | 3 |
| AEY70387.1             | 81  | Omega-gliadin, partial        | <i>Ae. tauschii</i>                                            | 3 |
| ACN62216.1             | 79  | Omega-gliadin, partial        | <i>T. aestivum</i> ×<br><i>L. elongatum</i>                    | 3 |
| ACQ83630.1             | 77  | Omega secalin                 | <i>S. cereale</i> ×<br><i>T. turgidum</i> ssp.<br><i>durum</i> | 2 |
| ACQ83633.1             | 76  | Omega secalin                 | <i>S. cereale</i> ×<br><i>T. aestivum</i>                      | 3 |
| ACO40286.1             | 68  | Putative omega secalin        | <i>T. aestivum</i>                                             | 2 |
| ADF58077.1             | 67  | Omega-gliadin, partial        | <i>T. urartu</i>                                               | 2 |
| <b>α-gliadins (63)</b> |     |                               |                                                                |   |
| ACJ76939.1             | 224 | Alfa gliadin                  | <i>T. monococcum</i>                                           | 5 |
| AHN85627.1             | 224 | Alpha-gliadin protein         | <i>T. aestivum</i>                                             | 5 |
| AHY37819.1             | 165 | Alpha-gliadin                 | <i>T. aestivum</i>                                             | 4 |
| ADA83689.1             | 157 | Alpha-gliadin                 | <i>T. turgidum</i> ssp.<br><i>durum</i>                        | 4 |
| BAA12318.1             | 157 | Alpha-gliadin                 | <i>T. aestivum</i>                                             | 4 |
| AAZ73730.1             | 155 | Alpha-type gliadin, partial   | <i>T. dicoccoides</i>                                          | 4 |
| CAB76955.1             | 147 | Alpha-gliadin                 | <i>T. aestivum</i>                                             | 4 |
| AFK32698.1             | 143 | Alpha-gliadin protein         | <i>Ae. tauschii</i>                                            | 6 |
| BAM08452.1             | 139 | Alpha/beta-gliadin            | <i>T. aestivum</i>                                             | 4 |
| BAM08455.1             | 139 | Alpha/beta-gliadin            | <i>T. aestivum</i>                                             | 4 |
| BAM08456.1             | 139 | Alpha/beta-gliadin            | <i>T. aestivum</i>                                             | 4 |
| BAM08458.1             | 139 | Alpha/beta-gliadin            | <i>T. aestivum</i>                                             | 4 |
| AHY37815.1             | 139 | Alpha-gliadin                 | <i>T. aestivum</i>                                             | 4 |
| BAM08454.1             | 137 | Alpha/beta-gliadin            | <i>T. aestivum</i>                                             | 4 |
| ABB92633.1             | 132 | Alpha-gliadin protein         | <i>T. turgidum</i> ssp.<br><i>durum</i>                        | 3 |
| AKB95618.1             | 129 | Alpha-gliadin protein         | <i>T. urartu</i>                                               | 3 |
| AFQ13475.1             | 123 | Alpha-gliadin                 | <i>T. aestivum</i>                                             | 3 |
| AGO17679.1             | 120 | Alpha-gliadin                 | <i>T. aestivum</i>                                             | 3 |
| ABQ52119.1             | 118 | Alpha-gliadin                 | <i>T. aestivum</i>                                             | 3 |
| AFK32701.1             | 117 | Alpha-gliadin protein         | <i>Ae. tauschii</i>                                            | 4 |
| AFK32696.1             | 117 | Alpha-gliadin protein         | <i>Ae. tauschii</i>                                            | 4 |
| AAY45943.1             | 117 | Alpha-gliadin storage protein | <i>Ae. tauschii</i>                                            | 3 |
| AGW80506.1             | 117 | Alpha-gliadin                 | <i>Ae. tauschii</i>                                            | 3 |
| AAA96276.1             | 116 | Alpha-gliadin                 | <i>T. aestivum</i>                                             | 3 |
| CAB76962.1             | 109 | Alpha-gliadin                 | <i>T. aestivum</i>                                             | 3 |
| CAB76964.1             | 108 | Alpha-gliadin                 | <i>T. aestivum</i>                                             | 3 |
| AFQ13466.1             | 103 | Alpha-gliadin                 | <i>T. aestivum</i>                                             | 3 |
| AFQ13471.1             | 103 | Alpha-gliadin                 | <i>T. aestivum</i>                                             | 3 |
| AFX69619.1             | 103 | Alpha-gliadin                 | <i>T. aestivum</i>                                             | 3 |

|                                                       |     |                                                |                                             |   |
|-------------------------------------------------------|-----|------------------------------------------------|---------------------------------------------|---|
| CAB76956.1                                            | 103 | Alpha-gliadin                                  | <i>T. aestivum</i>                          | 3 |
| AAZ94420.1                                            | 101 | Alpha-/beta-gliadin storage protein precursor  | <i>T. aestivum</i>                          | 3 |
| AFH74441.1                                            | 93  | Alpha-gliadin                                  | <i>T. dicoccoides</i>                       | 3 |
| AAZ94421.1                                            | 91  | Alpha-/beta-gliadin storage protein precursor  | <i>T. aestivum</i>                          | 2 |
| AAY45938.1                                            | 75  | Alpha-gliadin storage protein                  | <i>Ae. tauschii</i>                         | 2 |
| ABS72145.1                                            | 71  | Alpha gliadin                                  | <i>T. aestivum</i>                          | 2 |
| ABS72157.1                                            | 71  | Alpha gliadin                                  | <i>Th. ponticum</i> ×<br><i>T. aestivum</i> | 2 |
| AFX69609.1                                            | 71  | Alpha-gliadin                                  | <i>T. aestivum</i>                          | 2 |
| AFX69625.1                                            | 71  | Alpha-gliadin                                  | <i>T. aestivum</i>                          | 2 |
| AGO17644.1                                            | 71  | Alpha-gliadin                                  | <i>Ae. tauschii</i>                         | 2 |
| AGO17647.1                                            | 71  | Alpha-gliadin                                  | <i>Ae. tauschii</i>                         | 2 |
| AGW80509.1                                            | 71  | Alpha-gliadin                                  | <i>Ae. tauschii</i>                         | 2 |
| AHJ60676.1                                            | 71  | Alpha-gliadin                                  | <i>Ae. tauschii</i>                         | 2 |
| AAY45936.1                                            | 71  | Alpha-gliadin storage protein, partial         | <i>Ae. tauschii</i>                         | 2 |
| AAY45940.1                                            | 71  | Alpha-gliadin storage protein, partial         | <i>Ae. tauschii</i>                         | 2 |
| ADM96153.1                                            | 71  | Alpha-gliadin storage protein                  | <i>Ae. tauschii</i>                         | 2 |
| ADM96157.1                                            | 71  | Alpha-gliadin storage protein                  | <i>Ae. tauschii</i>                         | 2 |
| ADM96162.1                                            | 71  | Alpha-gliadin storage protein                  | <i>Ae. tauschii</i>                         | 2 |
| AFK32693.1                                            | 71  | Alpha-gliadin protein                          | <i>Ae. tauschii</i>                         | 2 |
| AFK32704.1                                            | 71  | Alpha-gliadin protein                          | <i>Ae. tauschii</i>                         | 2 |
| AFK32706.1                                            | 71  | Alpha-gliadin protein                          | <i>Ae. tauschii</i>                         | 2 |
| AFQ13463.1                                            | 70  | Alpha-gliadin                                  | <i>T. aestivum</i>                          | 2 |
| AFX69579.1                                            | 70  | Alpha-gliadin                                  | <i>T. aestivum</i>                          | 2 |
| AFX69600.1                                            | 70  | Alpha-gliadin                                  | <i>Ae. tauschii</i>                         | 2 |
| AGO17643.1                                            | 70  | Alpha-gliadin                                  | <i>Ae. tauschii</i>                         | 2 |
| AGO17645.1                                            | 70  | Alpha-gliadin                                  | <i>Ae. tauschii</i>                         | 2 |
| AGO17654.1                                            | 70  | Alpha-gliadin                                  | <i>Ae. tauschii</i>                         | 2 |
| AGO17675.1                                            | 70  | Alpha-gliadin                                  | <i>T. aestivum</i>                          | 2 |
| AGO17688.1                                            | 70  | Alpha-gliadin                                  | <i>T. aestivum</i>                          | 2 |
| AGW80492.1                                            | 70  | Alpha-gliadin                                  | <i>Ae. tauschii</i>                         | 2 |
| AGO17667.1                                            | 70  | Alpha-gliadin                                  | <i>T. aestivum</i>                          | 2 |
| ABQ52111.1                                            | 66  | Alpha-gliadin                                  | <i>Ae. tauschii</i>                         | 2 |
| AFX69616.1                                            | 66  | Alpha-gliadin                                  | <i>T. aestivum</i>                          | 2 |
| AGO17662.1                                            | 66  | Alpha-gliadin                                  | <i>T. aestivum</i>                          | 2 |
| <b>LMW-GS within <math>\alpha</math>-gliadins (5)</b> |     |                                                |                                             |   |
| ACA63873.1                                            | 134 | Low molecular weight glutenin subunit          | <i>T. aestivum</i>                          | 4 |
| ACA63856.1                                            | 132 | Low molecular weight glutenin subunit          | <i>T. aestivum</i>                          | 4 |
| ACA63857.1                                            | 132 | Low molecular weight glutenin subunit          | <i>T. aestivum</i>                          | 4 |
| AFI81534.1                                            | 132 | Low molecular weight glutenin subunit, partial | <i>T. aestivum</i>                          | 4 |
| AFI81553.1                                            | 132 | Low molecular weight glutenin subunit, partial | <i>T. aestivum</i>                          | 4 |
| <b><math>\gamma</math>-gliadins (28)</b>              |     |                                                |                                             |   |
| AFX69682.1                                            | 176 | Gamma-gliadin                                  | <i>T. aestivum</i>                          | 4 |
| ACJ03494.1                                            | 174 | Gamma-gliadin                                  | <i>T. monococcum</i>                        | 4 |
| AFX69671.1                                            | 174 | Gamma-gliadin                                  | <i>T. monococcum</i>                        | 4 |

|                                                       |     |                                                  |                                             |   |
|-------------------------------------------------------|-----|--------------------------------------------------|---------------------------------------------|---|
| AFX69673.1                                            | 174 | Gamma-gliadin                                    | <i>T. monococcum</i>                        | 4 |
| AFX69674.1                                            | 174 | Gamma-gliadin                                    | <i>T. monococcum</i>                        | 4 |
| AFX69675.1                                            | 174 | Gamma-gliadin                                    | <i>T. monococcum</i>                        | 4 |
| AGZ20271.1                                            | 174 | Gamma-gliadin                                    | <i>T. aestivum</i>                          | 4 |
| ACF93462.1                                            | 173 | Gamma-gliadin                                    | <i>T. aestivum</i>                          | 4 |
| AFX69679.1                                            | 173 | Gamma-gliadin                                    | <i>T. aestivum</i>                          | 4 |
| AFX69680.1                                            | 173 | Gamma-gliadin                                    | <i>T. aestivum</i>                          | 4 |
| AFX69681.1                                            | 173 | Gamma-gliadin                                    | <i>T. aestivum</i>                          | 4 |
| AGO17691.1                                            | 173 | Gamma-gliadin                                    | <i>T. aestivum</i>                          | 4 |
| AGO17692.1                                            | 173 | Gamma-gliadin                                    | <i>T. aestivum</i>                          | 4 |
| AGO17693.1                                            | 173 | Gamma-gliadin                                    | <i>T. aestivum</i>                          | 4 |
| AGO17696.1                                            | 173 | Gamma-gliadin                                    | <i>T. aestivum</i>                          | 4 |
| AGO17701.1                                            | 173 | Gamma-gliadin                                    | <i>T. aestivum</i>                          | 4 |
| ACJ03441.1                                            | 158 | Gamma-gliadin                                    | <i>T. turgidum</i>                          | 4 |
| ACJ03470.1                                            | 158 | Gamma-gliadin                                    | <i>T. aestivum</i>                          | 4 |
| P21292.1                                              | 158 | RecName: Full=Gamma-gliadin;<br>Flags: Precursor | <i>T. aestivum</i>                          | 4 |
| AEW46783.1                                            | 138 | Gamma prolamin                                   | <i>Ae. uniaristata</i>                      | 3 |
| AED99849.1                                            | 133 | Gamma-gliadin                                    | <i>T. monococcum</i>                        | 3 |
| AFC98435.1                                            | 133 | Gamma-gliadin                                    | <i>T. aestivum</i>                          | 3 |
| AFC98436.1                                            | 133 | Gamma-gliadin                                    | <i>T. aestivum</i>                          | 3 |
| AFC98437.1                                            | 133 | Gamma-gliadin                                    | <i>T. aestivum</i>                          | 3 |
| AFC98438.1                                            | 133 | Gamma-gliadin                                    | <i>T. aestivum</i>                          | 3 |
| AAF42989.1                                            | 130 | Gamma-gliadin                                    | <i>T. aestivum</i>                          | 3 |
| AFX69682.1                                            | 94  | Gamma-gliadin                                    | <i>T. aestivum</i>                          | 3 |
| ACI04100.1                                            | 84  | Gamma-gliadin                                    | <i>T. aestivum</i> ×<br><i>L. elongatum</i> | 2 |
| <b>LMW-GS within <math>\gamma</math>-gliadins (9)</b> |     |                                                  |                                             |   |
| ACA63873.1                                            | 136 | Low molecular weight glutenin subunit            | <i>T. aestivum</i>                          | 3 |
| AGK83148.1                                            | 136 | Low-molecular-weight glutenin subunit, partial   | <i>T. aestivum</i>                          | 3 |
| AGK83270.1                                            | 136 | Low-molecular-weight glutenin subunit, partial   | <i>T. aestivum</i>                          | 3 |
| ACA63856.1                                            | 134 | Low molecular weight glutenin subunit            | <i>T. aestivum</i>                          | 3 |
| ACA63857.1                                            | 134 | Low molecular weight glutenin subunit            | <i>T. aestivum</i>                          | 3 |
| BAJ09388.1                                            | 134 | Low molecular weight glutenin subunit            | <i>T. aestivum</i>                          | 3 |
| AFI81534.1                                            | 134 | Low molecular weight glutenin subunit, partial   | <i>T. aestivum</i>                          | 3 |
| AFI81553.1                                            | 134 | Low molecular weight glutenin subunit, partial   | <i>T. aestivum</i>                          | 3 |
| AGK83348.1                                            | 134 | Low-molecular-weight glutenin subunit, partial   | <i>T. aestivum</i>                          | 3 |
| <b>LMW-GS (82)</b>                                    |     |                                                  |                                             |   |
| AGK83348.1                                            | 368 | Low-molecular-weight glutenin subunit, partial   | <i>T. aestivum</i>                          | 9 |
| ACA63873.1                                            | 365 | Low molecular weight glutenin subunit            | <i>T. aestivum</i>                          | 9 |
| AGK83148.1                                            | 365 | Low-molecular-weight glutenin subunit, partial   | <i>T. aestivum</i>                          | 9 |

|            |     |                                                        |                        |   |
|------------|-----|--------------------------------------------------------|------------------------|---|
| AGK83270.1 | 365 | Low-molecular-weight glutenin subunit, partial         | <i>T. aestivum</i>     | 9 |
| ACA63856.1 | 364 | Low molecular weight glutenin subunit                  | <i>T. aestivum</i>     | 9 |
| ACA63857.1 | 364 | Low molecular weight glutenin subunit                  | <i>T. aestivum</i>     | 9 |
| BAJ09388.1 | 364 | Low molecular glutenin subunit                         | <i>T. aestivum</i>     | 9 |
| AFI81534.1 | 364 | Low molecular weight glutenin subunit, partial         | <i>T. aestivum</i>     | 9 |
| AFI81553.1 | 364 | Low molecular weight glutenin subunit, partial         | <i>T. aestivum</i>     | 9 |
| ACC60296.1 | 303 | Low molecular weight glutenin subunit                  | <i>Ae. uniaristata</i> | 7 |
| ACB98718.1 | 301 | Low molecular weight glutenin subunit M3               | <i>Ae. comosa</i>      | 7 |
| AGO17755.1 | 273 | LMW-GS, partial                                        | <i>T. aestivum</i>     | 7 |
| BAB78763.1 | 271 | Low-molecular-weight glutenin subunit group 12 type VI | <i>T. aestivum</i>     | 7 |
| BAB78764.1 | 271 | Low-molecular-weight glutenin subunit group 12 type VI | <i>T. aestivum</i>     | 7 |
| ACT98430.1 | 271 | Low-molecular-weight glutenin subunit                  | <i>T. aestivum</i>     | 7 |
| AGK83149.1 | 271 | Low-molecular-weight glutenin subunit, partial         | <i>T. aestivum</i>     | 7 |
| AGK83250.1 | 271 | Low-molecular-weight glutenin subunit, partial         | <i>T. aestivum</i>     | 7 |
| AGK83329.1 | 271 | Low-molecular-weight glutenin subunit, partial         | <i>T. aestivum</i>     | 7 |
| AGO17737.1 | 271 | LMW-GS, partial                                        | <i>T. aestivum</i>     | 7 |
| AGO17739.1 | 271 | LMW-GS, partial                                        | <i>T. aestivum</i>     | 7 |
| AGO17734.1 | 270 | LMW-GS, partial                                        | <i>T. aestivum</i>     | 7 |
| AAS10190.1 | 267 | Low molecular weight glutenin subunit                  | <i>T. aestivum</i>     | 6 |
| ACT98424.1 | 267 | Low-molecular-weight glutenin subunit                  | <i>T. aestivum</i>     | 6 |
| AGK83145.1 | 267 | Low-molecular-weight glutenin subunit, partial         | <i>T. aestivum</i>     | 6 |
| BAB78762.1 | 260 | Low-molecular-weight glutenin subunit group 11 type VI | <i>T. aestivum</i>     | 6 |
| ACP27640.1 | 259 | Low molecular weight glutenin subunit                  | <i>T. aestivum</i>     | 6 |
| ACF93464.1 | 249 | LMW-glutenin                                           | <i>T. aestivum</i>     | 6 |
| ABD72601.1 | 244 | Low-molecular-weight glutenin subunit                  | <i>T. aestivum</i>     | 5 |
| AGK83196.1 | 241 | Low-molecular-weight glutenin subunit                  | <i>T. aestivum</i>     | 6 |
| AEI00684.1 | 240 | Low-molecular-weight glutenin subunit                  | <i>T. aestivum</i>     | 6 |
| EMS57120.1 | 234 | Glutenin, low molecular weight subunit                 | <i>T. urartu</i>       | 6 |
| AIR77130.1 | 234 | Low-molecular-weight glutenin subunit, partial         | <i>T. urartu</i>       | 6 |
| BAA23162.2 | 233 | LMM glutenin 3                                         | <i>T. aestivum</i>     | 6 |

|            |     |                                                           |                                              |   |
|------------|-----|-----------------------------------------------------------|----------------------------------------------|---|
| ABB17936.1 | 223 | Gamma-gliadin/LMW-glutenin chimera Ch2 precursor, partial | <i>T. aestivum</i>                           | 6 |
| ACJ76962.1 | 212 | Low molecular weight glutenin                             | <i>T. monococcum</i>                         | 5 |
| ACJ76964.1 | 212 | Low molecular weight glutenin                             | <i>T. monococcum</i>                         | 5 |
| ABQ50899.1 | 211 | Type I LMW-glutenin LMW-i1                                | <i>T. monococcum</i>                         | 5 |
| AGU91691.1 | 207 | LMW-i glutenin subunit 37                                 | <i>T. aestivum</i>                           | 5 |
| ACF93465.1 | 207 | LMW-glutenin                                              | <i>T. aestivum</i>                           | 5 |
| ABY40381.1 | 206 | Low-molecular-weight glutenin subunit                     | <i>Ae. longissima</i>                        | 6 |
| ACV32584.1 | 206 | Low molecular weight glutenin                             | <i>Ae. speltoides</i>                        | 6 |
| AAP44991.1 | 197 | Low molecular weight glutenin precursor                   | <i>T. aestivum</i> ssp. <i>tibeticum</i>     | 4 |
| ACX46117.1 | 197 | Low molecular weight glutenin subunit m1                  | <i>T. timopheevii</i> ssp. <i>armeniicum</i> | 4 |
| AAB48475.1 | 195 | Low-molecular-weight glutenin storage protein             | <i>T. aestivum</i>                           | 4 |
| BAB78759.1 | 195 | Low-molecular-weight glutenin subunit group 8 type IV     | <i>T. aestivum</i>                           | 4 |
| BAB78760.1 | 195 | Low-molecular-weight glutenin subunit group 9 type IV     | <i>T. aestivum</i>                           | 4 |
| AAU04842.1 | 195 | Low molecular weight glutenin subunit XJLMW-1347          | <i>T. aestivum</i>                           | 4 |
| AAV75994.1 | 195 | Low molecular weight glutenin subunit                     | <i>Th. ponticum</i> × <i>T. aestivum</i>     | 4 |
| AAV92011.1 | 195 | Low molecular weight glutenin                             | <i>T. aestivum</i>                           | 4 |
| ABG76007.1 | 195 | Low molecular weight glutenin subunit GF-2                | <i>T. aestivum</i>                           | 4 |
| ABV03149.1 | 195 | Low molecular weight glutenin, partial                    | <i>T. turgidum</i>                           | 4 |
| ABV72239.1 | 195 | Low molecular weight glutenin subunit                     | <i>Th. ponticum</i> × <i>T. aestivum</i>     | 4 |
| ABV72242.1 | 195 | Low molecular weight glutenin subunit                     | <i>Th. ponticum</i> × <i>T. aestivum</i>     | 4 |
| ABV72243.1 | 195 | Low molecular weight glutenin subunit                     | <i>Th. ponticum</i> × <i>T. aestivum</i>     | 4 |
| ABV72244.1 | 195 | Low molecular weight glutenin subunit                     | <i>Th. ponticum</i> × <i>T. aestivum</i>     | 4 |
| ABV72248.1 | 195 | Low molecular weight glutenin subunit                     | <i>Th. ponticum</i> × <i>T. aestivum</i>     | 4 |
| ABV72249.1 | 195 | Low molecular weight glutenin subunit                     | <i>Th. ponticum</i> × <i>T. aestivum</i>     | 4 |
| ABV72253.1 | 195 | Low molecular weight glutenin subunit                     | <i>Th. ponticum</i> × <i>T. aestivum</i>     | 4 |
| ABZ79361.1 | 195 | Low molecular weight glutenin subunit                     | <i>T. timopheevii</i>                        | 4 |
| ABZ79362.1 | 195 | Low molecular weight glutenin subunit                     | <i>T. timopheevii</i>                        | 4 |
| AEO21443.1 | 195 | Low molecular weight glutenin subunit, partial            | <i>T. aestivum</i>                           | 4 |
| ABY58128.1 | 195 | LMW-m glutenin subunit 0072P19-M                          | <i>T. aestivum</i>                           | 4 |



|                                     |     |                                                        |                                             |   |
|-------------------------------------|-----|--------------------------------------------------------|---------------------------------------------|---|
| ABV72238.1                          | 195 | Low molecular weight glutenin subunit                  | <i>Th. ponticum</i> ×<br><i>T. aestivum</i> | 4 |
| BAA22613.2                          | 193 | LMM glutenin 1                                         | <i>T. aestivum</i>                          | 4 |
| AAP44992.1                          | 191 | Low molecular weight glutenin precursor                | <i>T. aestivum</i> ssp.<br><i>tibeticum</i> | 4 |
| ADH51279.1                          | 182 | LMW glutenin subunit Glu-D3                            | <i>T. aestivum</i>                          | 4 |
| CAA74550.1                          | 181 | Low molecular weight glutenin subunit                  | <i>T. turgidum</i> ssp.<br><i>durum</i>     | 4 |
| AAT36483.1                          | 172 | s-Type low molecular weight glutenin L4-36             | <i>T. aestivum</i>                          | 5 |
| AAT37861.1                          | 172 | Low molecular weight glutenin subunit LMW.S6 precursor | <i>Ae. tauschii</i>                         | 5 |
| ABI21861.1                          | 172 | Low molecular weight glutenin                          | <i>T. aestivum</i>                          | 5 |
| ABY58134.1                          | 172 | LMW-m glutenin subunit 0703A9-M                        | <i>T. aestivum</i>                          | 5 |
| ACY08820.1                          | 172 | Low molecular weight glutenin subunit D3-1             | <i>T. aestivum</i>                          | 5 |
| AEI00697.1                          | 172 | Low-molecular-weight glutenin subunit                  | <i>T. aestivum</i>                          | 5 |
| AGK83315.1                          | 172 | Low-molecular-weight glutenin subunit                  | <i>T. aestivum</i>                          | 5 |
| AGK83315.1                          | 172 | Low-molecular-weight glutenin subunit                  | <i>T. aestivum</i>                          | 5 |
| AEI00683.1                          | 172 | Low-molecular-weight glutenin subunit                  | <i>T. aestivum</i>                          | 5 |
| AAX98173.1                          | 157 | Low molecular weight glutenin subunit                  | <i>T. aestivum</i>                          | 3 |
| CAB40553.1                          | 148 | Low molecular weight glutenin subunit                  | <i>T. turgidum</i> ssp.<br><i>durum</i>     | 4 |
| AFV79559.1                          | 146 | Low molecular weight glutenin subunit                  | <i>T. dicoccoides</i>                       | 3 |
| CAC05403.1                          | 145 | Low molecular weight glutenin subunit                  | <i>T. turgidum</i> ssp.<br><i>durum</i>     | 3 |
| AAT76905.1                          | 145 | Low molecular weight protein                           | <i>Ae. tauschii</i> ×<br><i>T. turgidum</i> | 3 |
| AGK83307.1                          | 145 | Low-molecular-weight glutenin subunit, partial         | <i>T. aestivum</i>                          | 3 |
| <b>α-gliadins within LMW-GS (3)</b> |     |                                                        |                                             |   |
| BAM08455.1                          | 231 | Alpha/beta-gliadin                                     | <i>T. aestivum</i>                          | 5 |
| BAM08452.1                          | 153 | Alpha/beta-gliadin                                     | <i>T. aestivum</i>                          | 4 |
| BAM08454.1                          | 153 | Alpha/beta-gliadin                                     | <i>T. aestivum</i>                          | 4 |
