# Supplementary material for: Isolation and characterization of gluten protein types from wheat, rye, barley and oats for use as reference materials
Source: PubMed Central journal article supplement (PMC5325591; doi:10.1371/journal.pone.0172819), 2017-02-24
Supplement: pone.0172819.s009.pdf [file pone.0172819.s009.pdf]

**S6 Table. Protein sequences (protein score > 63) identified in each isolated rye gluten protein type (GPT).** The isolated rye GPT were digested with chymotrypsin, analyzed by untargeted LC-MS/MS and the MS/MS files searched using the Mascot software and the NCBI Protein database (taxonomy *Viridiplantae*).

| Protein type<br>(number of hits)<br>NCBI Accession | Protein score | Protein name                                             | Organism                               | Number of peptide sequences |
|----------------------------------------------------|---------------|----------------------------------------------------------|----------------------------------------|-----------------------------|
| <b>HMW-secalins (14)</b>                           |               |                                                          |                                        |                             |
| CAC40670.1                                         | 670           | High molecular weight glutenin subunit x                 | <i>S. cereale ssp. segetale</i>        | 16                          |
| CAC40674.1                                         | 670           | High molecular weight glutenin subunit x                 | <i>S. cereale ssp. ancestrale</i>      | 16                          |
| CAC40680.1                                         | 670           | High molecular weight glutenin subunit x                 | <i>S. cereale</i>                      | 16                          |
| ADC79689.1                                         | 670           | HMW glutenin subunit Rx                                  | <i>S. cereale</i>                      | 16                          |
| AHI62993.1                                         | 669           | High molecular weight glutenin subunit x                 | <i>T. aestivum</i>                     | 16                          |
| CAC40677.1                                         | 283           | High molecular weight glutenin subunit x                 | <i>S. cereale ssp. dighoricum</i>      | 6                           |
| CAC40671.1                                         | 281           | High molecular weight glutenin subunit x                 | <i>S. cereale ssp. afghanicum</i>      | 6                           |
| CAC40672.1                                         | 128           | High molecular weight glutenin subunit y                 | <i>S. cereale ssp. afghanicum</i>      | 4                           |
| AGS18765.1                                         | 109           | High-molecular-weight glutenin subunit                   | <i>S. cereale</i> × <i>T. aestivum</i> | 3                           |
| AAF23507.1                                         | 81            | Glutenin, high molecular weight subunit type y precursor | <i>T. aestivum</i>                     | 2                           |
| CAC40669.1                                         | 81            | High molecular weight glutenin subunit y                 | <i>S. cereale</i>                      | 2                           |
| CAC40676.1                                         | 81            | High molecular weight glutenin subunit y                 | <i>S. cereale ssp. dighoricum</i>      | 2                           |
| CAC40681.1                                         | 81            | High molecular weight glutenin subunit y                 | <i>S. cereale</i>                      | 2                           |
| CAC40682.1                                         | 81            | High molecular weight glutenin subunit y                 | <i>S. cereale</i>                      | 2                           |
| <b>γ-75k-secalins (65)</b>                         |               |                                                          |                                        |                             |
| ABO32295.1                                         | 270           | 75k gamma secalin                                        | <i>S. vavilovii</i>                    | 5                           |
| AFX60464.1                                         | 270           | 75k gamma secalin                                        | <i>S. cereale</i>                      | 5                           |
| AEZ06411.1                                         | 267           | 75k gamma secalin                                        | <i>S. strictum</i>                     | 5                           |
| AAG35598.1                                         | 265           | Secalin precursor                                        | <i>S. cereale</i>                      | 5                           |
| ADP95481.1                                         | 265           | 75k gamma secalin                                        | <i>S. cereale</i>                      | 5                           |
| AEZ06410.1                                         | 265           | 75k gamma secalin                                        | <i>S. strictum</i>                     | 5                           |
| AFX60462.1                                         | 233           | 75k gamma secalin                                        | <i>S. cereale</i>                      | 5                           |
| AFX60463.1                                         | 233           | 75k gamma secalin                                        | <i>S. cereale</i>                      | 5                           |
| AFX60467.1                                         | 233           | 75k gamma secalin                                        | <i>S. cereale</i>                      | 5                           |
| ADP95480.1                                         | 229           | 75k gamma secalin                                        | <i>S. cereale</i>                      | 5                           |
| AEZ06409.1                                         | 229           | 75k gamma secalin                                        | <i>S. strictum</i>                     | 5                           |
| ADP95479.1                                         | 227           | 75k gamma secalin                                        | <i>S. cereale</i>                      | 5                           |
| ADP95517.1                                         | 227           | 75k gamma secalin                                        | <i>T. aestivum</i>                     | 5                           |

|            |     |                   |                                                                      |   |
|------------|-----|-------------------|----------------------------------------------------------------------|---|
| AFX60458.1 | 221 | 75k gamma secalin | <i>S. strictum ssp. africanum</i>                                    | 4 |
| ADP95487.1 | 214 | 75k gamma secalin | <i>T. aestivum</i>                                                   | 5 |
| ADP95493.1 | 214 | 75k gamma secalin | <i>T. aestivum</i>                                                   | 5 |
| ADP95512.1 | 214 | 75k gamma secalin | <i>T. aestivum</i>                                                   | 5 |
| ADP95513.1 | 214 | 75k gamma secalin | <i>T. aestivum</i>                                                   | 5 |
| ADP95520.1 | 214 | 75k gamma secalin | <i>T. aestivum</i>                                                   | 5 |
| ABO32293.1 | 171 | 75k gamma secalin | <i>S. sylvestre</i>                                                  | 3 |
| ADP95484.1 | 171 | 75k gamma secalin | <i>S. cereale</i>                                                    | 3 |
| ADP95502.1 | 171 | 75k gamma secalin | <i>T. aestivum</i>                                                   | 3 |
| ADP95504.1 | 171 | 75k gamma secalin | <i>T. aestivum</i>                                                   | 3 |
| AFX60455.1 | 171 | 75k gamma secalin | <i>S. strictum ssp. africanum</i>                                    | 3 |
| ABO32294.1 | 169 | Secalin precursor | <i>S. cereale</i>                                                    | 3 |
| ADP95482.1 | 169 | 75k gamma secalin | <i>S. cereale</i>                                                    | 3 |
| ADP95483.1 | 169 | 75k gamma secalin | <i>S. cereale</i>                                                    | 3 |
| ADP95487.1 | 169 | 75k gamma secalin | <i>S. cereale</i>                                                    | 3 |
| ADP95490.1 | 169 | 75k gamma secalin | <i>S. cereale</i>                                                    | 3 |
| ADP95491.1 | 169 | 75k gamma secalin | <i>S. cereale</i>                                                    | 3 |
| ADP95492.1 | 169 | 75k gamma secalin | <i>T. aestivum</i>                                                   | 3 |
| ADP95494.1 | 169 | 75k gamma secalin | <i>T. aestivum</i>                                                   | 3 |
| ADP95495.1 | 169 | 75k gamma secalin | <i>T. aestivum</i>                                                   | 3 |
| ADP95496.1 | 169 | 75k gamma secalin | <i>T. aestivum</i>                                                   | 3 |
| ADP95499.1 | 169 | 75k gamma secalin | <i>T. aestivum</i>                                                   | 3 |
| ADP95501.1 | 169 | 75k gamma secalin | <i>T. aestivum</i>                                                   | 3 |
| ADP95503.1 | 169 | 75k gamma secalin | <i>T. aestivum</i>                                                   | 3 |
| ADP95505.1 | 169 | 75k gamma secalin | <i>T. aestivum</i>                                                   | 3 |
| ADP95506.1 | 169 | 75k gamma secalin | <i>T. aestivum</i>                                                   | 3 |
| ADP95507.1 | 169 | 75k gamma secalin | <i>T. aestivum</i>                                                   | 3 |
| ADP95508.1 | 169 | 75k gamma secalin | <i>T. aestivum</i>                                                   | 3 |
| ADP95510.1 | 169 | 75k gamma secalin | <i>T. aestivum</i>                                                   | 3 |
| ADP95514.1 | 169 | 75k gamma secalin | <i>T. aestivum</i>                                                   | 3 |
| ADP95515.1 | 169 | 75k gamma secalin | <i>T. aestivum</i>                                                   | 3 |
| ADP95516.1 | 169 | 75k gamma secalin | <i>T. aestivum</i>                                                   | 3 |
| ADP95519.1 | 169 | 75k gamma secalin | <i>T. aestivum</i>                                                   | 3 |
| ADP95521.1 | 169 | 75k gamma secalin | <i>T. aestivum</i>                                                   | 3 |
| ADP95522.1 | 169 | 75k gamma secalin | <i>T. aestivum</i>                                                   | 3 |
| ADP95524.1 | 169 | 75k gamma secalin | <i>T. aestivum</i>                                                   | 3 |
| ADP95525.1 | 169 | 75k gamma secalin | <i>T. aestivum</i>                                                   | 3 |
| ADP95526.1 | 169 | 75k gamma secalin | <i>T. aestivum</i>                                                   | 3 |
| ADP95527.1 | 169 | 75k gamma secalin | <i>T. aestivum</i>                                                   | 3 |
| ADP95528.1 | 169 | 75k gamma secalin | <i>T. aestivum</i>                                                   | 3 |
| ADP95529.1 | 169 | 75k gamma secalin | <i>T. aestivum</i>                                                   | 3 |
| ADP95530.1 | 169 | 75k gamma secalin | <i>T. aestivum</i>                                                   | 3 |
| AEZ06408.1 | 169 | 75k gamma secalin | <i>S. strictum</i>                                                   | 3 |
| AEZ06412.1 | 169 | 75k gamma secalin | <i>S. strictum</i>                                                   | 3 |
| AFX60451.1 | 169 | 75k gamma secalin | <i>S. strictum ssp. africanum</i> ×<br><i>T. turgidum ssp. durum</i> | 3 |

|                                           |     |                                                                                                                                                                  |                                                                      |   |
|-------------------------------------------|-----|------------------------------------------------------------------------------------------------------------------------------------------------------------------|----------------------------------------------------------------------|---|
| AFX60452.1                                | 169 | 75k gamma secalin                                                                                                                                                | <i>S. strictum ssp. africanum</i> ×<br><i>T. turgidum ssp. durum</i> | 3 |
| AFX60453.1                                | 169 | 75k gamma secalin                                                                                                                                                | <i>S. strictum ssp. africanum</i> ×<br><i>T. turgidum ssp. durum</i> | 3 |
| AFX60456.1                                | 169 | 75k gamma secalin                                                                                                                                                | <i>S. strictum ssp. africanum</i>                                    | 3 |
| AFX60457.1                                | 169 | 75k gamma secalin                                                                                                                                                | <i>S. strictum ssp. africanum</i>                                    | 3 |
| AFX60459.1                                | 169 | 75k gamma secalin                                                                                                                                                | <i>S. strictum ssp. africanum</i>                                    | 3 |
| ADP95518.1                                | 169 | 75k gamma secalin                                                                                                                                                | <i>T. aestivum</i>                                                   | 3 |
| ADP95485.1                                | 169 | 75k gamma secalin                                                                                                                                                | <i>S. cereale</i>                                                    | 3 |
| <b>ω-secalins (16)</b>                    |     |                                                                                                                                                                  |                                                                      |   |
| ACQ83642.1                                | 128 | Omega secalin                                                                                                                                                    | <i>T. aestivum</i>                                                   | 4 |
| ACQ83639.1                                | 125 | Omega secalin                                                                                                                                                    | <i>T. aestivum</i>                                                   | 4 |
| ACQ83635.1                                | 125 | Omega secalin                                                                                                                                                    | <i>S. cereale</i> ×<br><i>T. aestivum</i>                            | 4 |
| CAA42836.1                                | 125 | Sec1 precursor                                                                                                                                                   | <i>S. cereale</i>                                                    | 4 |
| ACQ83629.1                                | 125 | Omega secalin                                                                                                                                                    | <i>S. cereale</i> ×<br><i>T. turgidum ssp. durum</i>                 | 4 |
| ACQ83631.1                                | 125 | Omega secalin                                                                                                                                                    | <i>S. cereale</i> ×<br><i>T. turgidum ssp. durum</i>                 | 4 |
| ACN96903.1                                | 123 | Putative omega secalin                                                                                                                                           | <i>T. aestivum</i>                                                   | 4 |
| ACQ83628.1                                | 123 | Omega secalin                                                                                                                                                    | <i>S. cereale</i>                                                    | 4 |
| CAA42837.1                                | 104 | Sec1 precursor                                                                                                                                                   | <i>S. cereale</i>                                                    | 4 |
| ACQ83627.1                                | 101 | Omega secalin                                                                                                                                                    | <i>S. cereale</i>                                                    | 3 |
| ACO40286.1                                | 101 | Putative omega secalin                                                                                                                                           | <i>T. aestivum</i>                                                   | 3 |
| ACO40284.1                                | 91  | Putative omega secalin                                                                                                                                           | <i>T. aestivum</i>                                                   | 2 |
| ACN96900.1                                | 89  | Putative omega secalin                                                                                                                                           | <i>T. aestivum</i>                                                   | 2 |
| ACQ83633.1                                | 79  | Omega secalin                                                                                                                                                    | <i>S. cereale</i> ×<br><i>T. aestivum</i>                            | 3 |
| ACQ83625.1                                | 67  | Putative omega secalin                                                                                                                                           | <i>T. aestivum</i>                                                   | 2 |
| AAB37407.1                                | 65  | omega 1-40 secalin isoform P1-2=coeliac immunoreactive protein/prolamin {N-terminal}<br>[Secale cereale=rye, cv. Petkus, seed endosperm, Peptide Partial, 24 aa] | <i>S. cereale</i>                                                    | 1 |
| <b>HMW-secalins within ω-secalins (4)</b> |     |                                                                                                                                                                  |                                                                      |   |
| CAC40670.1                                | 130 | High molecular weight glutenin subunit x                                                                                                                         | <i>S. cereale ssp. segetale</i>                                      | 3 |
| CAC40674.1                                | 130 | High molecular weight glutenin subunit x                                                                                                                         | <i>S. cereale ssp. segetale</i>                                      | 3 |
| CAC40680.1                                | 130 | High molecular weight glutenin subunit x                                                                                                                         | <i>S. cereale</i>                                                    | 3 |
| ADC79689.1                                | 130 | HMW glutenin subunit Rx                                                                                                                                          | <i>S. cereale</i>                                                    | 3 |

| <b><math>\gamma</math>-40k-secalins (4)</b>                                           |     |                         |                                    |   |
|---------------------------------------------------------------------------------------|-----|-------------------------|------------------------------------|---|
| AEW46799.1                                                                            | 388 | Gamma prolamin          | <i>S. cereale ssp. afghanicum</i>  | 7 |
| AEW46832.1                                                                            | 219 | Gamma prolamin, partial | <i>S. cereale ssp. afghanicum</i>  | 4 |
| AEW46838.1                                                                            | 219 | Gamma prolamin, partial | <i>S. strictum ssp. anatolicum</i> | 4 |
| AEW46841.1                                                                            | 78  | Gamma prolamin          | <i>S. cereale</i>                  | 2 |
| <b><math>\gamma</math>-75k-secalins within <math>\gamma</math>-40k- secalins (66)</b> |     |                         |                                    |   |
| AAG35598.1                                                                            | 96  | Secalin precursor       | <i>S. cereale</i>                  | 2 |
| ABO32293.1                                                                            | 96  | 75k gamma secalin       | <i>S. sylvestre</i>                | 2 |
| ADP95484.1                                                                            | 96  | 75k gamma secalin       | <i>S. cereale</i>                  | 2 |
| AFX60455.1                                                                            | 96  | 75k gamma secalin       | <i>S. strictum ssp. africanum</i>  | 2 |
| ABO32294.1                                                                            | 96  | Secalin precursor       | <i>S. cereale</i>                  | 2 |
| ABO32295.1                                                                            | 96  | 75k gamma secalin       | <i>S. vavilovii</i>                | 2 |
| ABO32296.1                                                                            | 96  | 75k gamma secalin       | <i>S. strictum</i>                 | 2 |
| ADP95479.1                                                                            | 96  | 75k gamma secalin       | <i>S. cereale</i>                  | 2 |
| ADP95481.1                                                                            | 96  | 75k gamma secalin       | <i>S. cereale</i>                  | 2 |
| ADP95482.1                                                                            | 96  | 75k gamma secalin       | <i>S. cereale</i>                  | 2 |
| ADP95483.1                                                                            | 96  | 75k gamma secalin       | <i>S. cereale</i>                  | 2 |
| ADP95485.1                                                                            | 96  | 75k gamma secalin       | <i>S. cereale</i>                  | 2 |
| ADP95487.1                                                                            | 96  | 75k gamma secalin       | <i>S. cereale</i>                  | 2 |
| ADP95488.1                                                                            | 96  | 75k gamma secalin       | <i>T. aestivum</i>                 | 2 |
| ADP95489.1                                                                            | 96  | 75k gamma secalin       | <i>T. aestivum</i>                 | 2 |
| ADP95490.1                                                                            | 96  | 75k gamma secalin       | <i>S. cereale</i>                  | 2 |
| ADP95491.1                                                                            | 96  | 75k gamma secalin       | <i>S. cereale</i>                  | 2 |
| ADP95492.1                                                                            | 96  | 75k gamma secalin       | <i>T. aestivum</i>                 | 2 |
| ADP95494.1                                                                            | 96  | 75k gamma secalin       | <i>T. aestivum</i>                 | 2 |
| ADP95495.1                                                                            | 96  | 75k gamma secalin       | <i>T. aestivum</i>                 | 2 |
| ADP95496.1                                                                            | 96  | 75k gamma secalin       | <i>T. aestivum</i>                 | 2 |
| ADP95497.1                                                                            | 96  | 75k gamma secalin       | <i>T. aestivum</i>                 | 2 |
| ADP95498.1                                                                            | 96  | 75k gamma secalin       | <i>T. aestivum</i>                 | 2 |
| ADP95499.1                                                                            | 96  | 75k gamma secalin       | <i>T. aestivum</i>                 | 2 |
| ADP95500.1                                                                            | 96  | 75k gamma secalin       | <i>T. aestivum</i>                 | 2 |
| ADP95501.1                                                                            | 96  | 75k gamma secalin       | <i>T. aestivum</i>                 | 2 |
| ADP95502.1                                                                            | 96  | 75k gamma secalin       | <i>T. aestivum</i>                 | 2 |
| ADP95503.1                                                                            | 96  | 75k gamma secalin       | <i>T. aestivum</i>                 | 2 |
| ADP95504.1                                                                            | 96  | 75k gamma secalin       | <i>T. aestivum</i>                 | 2 |
| ADP95505.1                                                                            | 96  | 75k gamma secalin       | <i>T. aestivum</i>                 | 2 |
| ADP95506.1                                                                            | 96  | 75k gamma secalin       | <i>T. aestivum</i>                 | 2 |
| ADP95507.1                                                                            | 96  | 75k gamma secalin       | <i>T. aestivum</i>                 | 2 |
| ADP95508.1                                                                            | 96  | 75k gamma secalin       | <i>T. aestivum</i>                 | 2 |
| ADP95510.1                                                                            | 96  | 75k gamma secalin       | <i>T. aestivum</i>                 | 2 |
| ADP95514.1                                                                            | 96  | 75k gamma secalin       | <i>T. aestivum</i>                 | 2 |
| ADP95515.1                                                                            | 96  | 75k gamma secalin       | <i>T. aestivum</i>                 | 2 |
| ADP95516.1                                                                            | 96  | 75k gamma secalin       | <i>T. aestivum</i>                 | 2 |
| ADP95519.1                                                                            | 96  | 75k gamma secalin       | <i>T. aestivum</i>                 | 2 |
| ADP95521.1                                                                            | 96  | 75k gamma secalin       | <i>T. aestivum</i>                 | 2 |
| ADP95522.1                                                                            | 96  | 75k gamma secalin       | <i>T. aestivum</i>                 | 2 |
| ADP95524.1                                                                            | 96  | 75k gamma secalin       | <i>T. aestivum</i>                 | 2 |
| ADP95525.1                                                                            | 96  | 75k gamma secalin       | <i>T. aestivum</i>                 | 2 |

|            |    |                   |                                                                        |   |
|------------|----|-------------------|------------------------------------------------------------------------|---|
| ADP95526.1 | 96 | 75k gamma secalin | <i>T. aestivum</i>                                                     | 2 |
| ADP95527.1 | 96 | 75k gamma secalin | <i>T. aestivum</i>                                                     | 2 |
| ADP95528.1 | 96 | 75k gamma secalin | <i>T. aestivum</i>                                                     | 2 |
| ADP95529.1 | 96 | 75k gamma secalin | <i>T. aestivum</i>                                                     | 2 |
| ADP95530.1 | 96 | 75k gamma secalin | <i>T. aestivum</i>                                                     | 2 |
| AEZ06408.1 | 96 | 75k gamma secalin | <i>S. strictum</i>                                                     | 2 |
| AEZ06412.1 | 96 | 75k gamma secalin | <i>S. strictum</i>                                                     | 2 |
| AFX60442.1 | 96 | 75k gamma secalin | <i>S. strictum ssp.<br/>africanum</i>                                  | 2 |
| AFX60443.1 | 96 | 75k gamma secalin | <i>S. strictum ssp.<br/>africanum</i>                                  | 2 |
| AFX60446.1 | 96 | 75k gamma secalin | <i>S. strictum ssp.<br/>africanum</i>                                  | 2 |
| AFX60447.1 | 96 | 75k gamma secalin | <i>S. strictum ssp.<br/>africanum</i>                                  | 2 |
| AFX60450.1 | 96 | 75k gamma secalin | <i>S. strictum ssp.<br/>africanum</i>                                  | 2 |
| AFX60451.1 | 96 | 75k gamma secalin | <i>S. strictum ssp.<br/>africanum ×<br/>T. turgidum ssp.<br/>durum</i> | 2 |
| AFX60452.1 | 96 | 75k gamma secalin | <i>S. strictum ssp.<br/>africanum ×<br/>T. turgidum ssp.<br/>durum</i> | 2 |
| AFX60453.1 | 96 | 75k gamma secalin | <i>S. strictum ssp.<br/>africanum ×<br/>T. turgidum ssp.<br/>durum</i> | 2 |
| AFX60456.1 | 96 | 75k gamma secalin | <i>S. strictum ssp.<br/>africanum</i>                                  | 2 |
| AFX60457.1 | 96 | 75k gamma secalin | <i>S. strictum ssp.<br/>africanum</i>                                  | 2 |
| AFX60458.1 | 96 | 75k gamma secalin | <i>S. strictum ssp.<br/>africanum</i>                                  | 2 |
| AFX60459.1 | 96 | 75k gamma secalin | <i>S. strictum ssp.<br/>africanum</i>                                  | 2 |
| AFX60462.1 | 96 | 75k gamma secalin | <i>S. cereale</i>                                                      | 2 |
| AFX60463.1 | 96 | 75k gamma secalin | <i>S. cereale</i>                                                      | 2 |
| AFX60464.1 | 96 | 75k gamma secalin | <i>S. cereale</i>                                                      | 2 |
| AFX60467.1 | 96 | 75k gamma secalin | <i>S. cereale</i>                                                      | 2 |
| ADP95518.1 | 96 | 75k gamma secalin | <i>T. aestivum</i>                                                     | 2 |
