# Supplementary material for: Isolation and characterization of gluten protein types from wheat, rye, barley and oats for use as reference materials
Source: PubMed Central journal article supplement (PMC5325591; doi:10.1371/journal.pone.0172819), 2017-02-24
Supplement: pone.0172819.s010.pdf [file pone.0172819.s010.pdf]

**S7 Table. Protein sequences (protein score > 63) identified in each isolated barley gluten protein type (GPT).** The isolated barley GPT were digested with chymotrypsin, analyzed by untargeted LC-MS/MS and the MS/MS files searched using the Mascot software and the NCBI Protein database (taxonomy *Viridiplantae*).

| Protein type<br>(number of hits)<br>NCBI Accession | Protein score | Protein name                                           | Organism                          | Number of peptide sequences |
|----------------------------------------------------|---------------|--------------------------------------------------------|-----------------------------------|-----------------------------|
| <b>D-hordeins (6)</b>                              |               |                                                        |                                   |                             |
| BAA11642.1                                         | 318           | D hordein                                              | <i>H. vulgare ssp. vulgare</i>    | 8                           |
| BAK04239.1                                         | 318           | Predicted protein                                      | <i>H. vulgare ssp. vulgare</i>    | 8                           |
| AFM77735.1                                         | 318           | D hordein                                              | <i>H. vulgare</i>                 | 8                           |
| AFM77736.1                                         | 318           | D hordein                                              | <i>H. vulgare</i>                 | 8                           |
| AFM77750.1                                         | 318           | D hordein                                              | <i>H. vulgare ssp. vulgare</i>    | 8                           |
| AAP31051.1                                         | 224           | D hordein                                              | <i>H. vulgare</i>                 | 6                           |
| <b>C-hordeins (6)</b>                              |               |                                                        |                                   |                             |
| AAB28161.1                                         | 310           | C-hordein                                              | <i>H. vulgare</i>                 | 7                           |
| CAA42642.1                                         | 183           | Unnamed protein product                                | <i>H. vulgare ssp. vulgare</i>    | 4                           |
| AFM77749.1                                         | 143           | C hordein                                              | <i>H. vulgare ssp. vulgare</i>    | 3                           |
| P02864.1                                           | 87            | RecName: Full=C-hordein                                | <i>H. vulgare ssp. spontaneum</i> | 2                           |
| P17991.1                                           | 64            | RecName: Full=C-hordein; AltName: Full=Clone PC HOR1-3 | <i>H. vulgare</i>                 | 2                           |
| AAA32942.1                                         | 64            | C-hordein, partial                                     | <i>H. vulgare</i>                 | 2                           |
| <b>γ-hordeins within γ/B-hordeins (3)</b>          |               |                                                        |                                   |                             |
| CAA51204.1                                         | 160           | Gamma 3 hordein, partial                               | <i>H. vulgare</i>                 | 4                           |
| P80198.1                                           | 160           | RecName: Full=Gamma-hordein-3                          | <i>H. vulgare</i>                 | 4                           |
| AFM77739.1                                         | 160           | Gamma 3 hordein                                        | <i>H. vulgare</i>                 | 4                           |
| <b>B-hordeins within γ/B-hordeins (23)</b>         |               |                                                        |                                   |                             |
| ABB82613.1                                         | 255           | B hordein                                              | <i>H. vulgare ssp. vulgare</i>    | 5                           |
| ACU09490.1                                         | 255           | B hordein                                              | <i>H. vulgare ssp. vulgare</i>    | 5                           |
| ACU09494.1                                         | 255           | B hordein                                              | <i>H. vulgare ssp. vulgare</i>    | 5                           |
| P06471.1                                           | 227           | RecName: Full=B3-hordein                               | <i>H. vulgare</i>                 | 5                           |
| AFM77744.1                                         | 223           | B3 hordein                                             | <i>H. vulgare</i>                 | 5                           |
| AFM77745.1                                         | 223           | B3 hordein                                             | <i>H. vulgare</i>                 | 5                           |
| ABH01262.1                                         | 193           | B hordein                                              | <i>H. vulgare ssp. vulgare</i>    | 4                           |
| ACU09491.1                                         | 167           | B hordein                                              | <i>H. vulgare ssp. vulgare</i>    | 4                           |
| P06470.1                                           | 147           | RecName: Full=B1-hordein; Flags: Precursor             | <i>H. vulgare</i>                 | 4                           |
| CAA25913.1                                         | 147           | Unnamed protein product, partial                       | <i>H. vulgare</i>                 | 4                           |

|                                            |     |                                            |                                |   |
|--------------------------------------------|-----|--------------------------------------------|--------------------------------|---|
| 1103203A                                   | 147 | Hordein B                                  | <i>H. vulgare ssp. vulgare</i> | 4 |
| AFM77747.1                                 | 135 | B3 hordein                                 | <i>H. vulgare</i>              | 3 |
| AFM77740.1                                 | 125 | B1 hordein                                 | <i>H. vulgare</i>              | 3 |
| AFM77741.1                                 | 125 | B1 hordein                                 | <i>H. vulgare</i>              | 3 |
| AFM77742.1                                 | 125 | B1 hordein                                 | <i>H. vulgare</i>              | 3 |
| AFM77743.1                                 | 125 | B1 hordein                                 | <i>H. vulgare</i>              | 3 |
| CAA25509.1                                 | 123 | Unnamed protein product, partial           | <i>H. vulgare</i>              | 3 |
| CAA60681.1                                 | 123 | B1 hordein                                 | <i>H. vulgare</i>              | 3 |
| AFM37566.1                                 | 123 | B-hordein                                  | <i>H. vulgare ssp. vulgare</i> | 3 |
| AFM77732.1                                 | 123 | B-hordein                                  | <i>H. vulgare ssp. vulgare</i> | 3 |
| AKZ20951.1                                 | 123 | B-hordein precursor                        | <i>H. vulgare ssp. vulgare</i> | 3 |
| AAZ76368.1                                 | 82  | B hordein                                  | <i>H. vulgare ssp. vulgare</i> | 2 |
| AFM77746.1                                 | 79  | B3 hordein                                 | <i>H. vulgare</i>              | 2 |
| <b>B-hordeins within B/γ-hordeins (17)</b> |     |                                            |                                |   |
| P06471.1                                   | 318 | RecName: Full=B3-hordein                   | <i>H. vulgare</i>              | 7 |
| AFM77744.1                                 | 249 | B3 hordein                                 | <i>H. vulgare</i>              | 6 |
| ABB82613.1                                 | 229 | B hordein                                  | <i>H. vulgare ssp. vulgare</i> | 5 |
| ACU09490.1                                 | 229 | B hordein                                  | <i>H. vulgare ssp. vulgare</i> | 5 |
| P06470.1                                   | 177 | RecName: Full=B1-hordein; Flags: Precursor | <i>H. vulgare</i>              | 5 |
| CAA25913.1                                 | 177 | Unnamed protein product, partial           | <i>H. vulgare</i>              | 5 |
| ABH01262.1                                 | 154 | B hordein                                  | <i>H. vulgare ssp. vulgare</i> | 4 |
| AFM77740.1                                 | 116 | B1 hordein                                 | <i>H. vulgare</i>              | 3 |
| AFM77741.1                                 | 116 | B1 hordein                                 | <i>H. vulgare</i>              | 3 |
| AFM77742.1                                 | 116 | B1 hordein                                 | <i>H. vulgare</i>              | 3 |
| AFM77743.1                                 | 116 | B1 hordein                                 | <i>H. vulgare</i>              | 3 |
| CAA60681.1                                 | 115 | B1 hordein                                 | <i>H. vulgare</i>              | 3 |
| CAA25509.1                                 | 115 | Unnamed protein product, partial           | <i>H. vulgare</i>              | 3 |
| AFM37566.1                                 | 115 | B-hordein                                  | <i>H. vulgare ssp. vulgare</i> | 3 |
| AFM77732.1                                 | 115 | B-hordein                                  | <i>H. vulgare ssp. vulgare</i> | 3 |
| AFM77747.1                                 | 112 | B3 hordein                                 | <i>H. vulgare</i>              | 3 |
| AAZ76368.1                                 | 92  | B hordein                                  | <i>H. vulgare ssp. vulgare</i> | 2 |
| <b>γ-hordeins within B/γ-hordeins (3)</b>  |     |                                            |                                |   |
| CAA51204.1                                 | 88  | Gamma 3 hordein, partial                   | <i>H. vulgare</i>              | 4 |
| P80198.1                                   | 88  | RecName: Full=Gamma-hordein-3              | <i>H. vulgare</i>              | 4 |
| AFM77739.1                                 | 88  | Gamma 3 hordein                            | <i>H. vulgare</i>              | 4 |
