# Supplementary material for: Isolation and characterization of gluten protein types from wheat, rye, barley and oats for use as reference materials
Source: PubMed Central journal article supplement (PMC5325591; doi:10.1371/journal.pone.0172819), 2017-02-24
Supplement: pone.0172819.s011.pdf [file pone.0172819.s011.pdf]

**S8 Table. Protein sequences (protein score > 63) identified in oat avenins.** The isolated avenin fraction was digested with chymotrypsin, analyzed by untargeted LC-MS/MS and the MS/MS files were searched using the Mascot software and the NCBI Protein database (taxonomy *Viridiplantae*).

| NCBI Accession      | Protein score | Protein name                                                                                                                                                      | Organism               | Number of peptide sequences |
|---------------------|---------------|-------------------------------------------------------------------------------------------------------------------------------------------------------------------|------------------------|-----------------------------|
| <b>Avenins (49)</b> |               |                                                                                                                                                                   |                        |                             |
| CCH22485.1          | 407           | Avenin                                                                                                                                                            | <i>A. eriantha</i>     | 9                           |
| CCH22488.1          | 405           | Avenin                                                                                                                                                            | <i>A. murphyi</i>      | 9                           |
| CCH22489.1          | 404           | Avenin                                                                                                                                                            | <i>A. magna</i>        | 9                           |
| CCH22518.1          | 380           | Avenin                                                                                                                                                            | <i>A. prostrata</i>    | 9                           |
| CCH22504.1          | 379           | Avenin                                                                                                                                                            | <i>A. canariensis</i>  | 9                           |
| CCH22487.1          | 378           | Avenin                                                                                                                                                            | <i>A. longiglumis</i>  | 9                           |
| CCH22493.1          | 365           | Avenin                                                                                                                                                            | <i>A. macrostachya</i> | 9                           |
| CCH22492.1          | 362           | Avenin, partial                                                                                                                                                   | <i>A. murphyi</i>      | 9                           |
| CCH22519.1          | 361           | Avenin                                                                                                                                                            | <i>A. sativa</i>       | 8                           |
| CBL51494.1          | 359           | Avenin protein, partial                                                                                                                                           | <i>A. sativa</i>       | 8                           |
| CCH22520.1          | 358           | Avenin                                                                                                                                                            | <i>A. strigosa</i>     | 8                           |
| CCH22490.1          | 354           | Avenin                                                                                                                                                            | <i>A. ventricosa</i>   | 8                           |
| CCH22491.1          | 354           | Avenin                                                                                                                                                            | <i>A. macrostachya</i> | 8                           |
| CCC80643.1          | 337           | Avenin protein, partial                                                                                                                                           | <i>A. longiglumis</i>  | 7                           |
| CBL51496.1          | 279           | Avenin protein, partial                                                                                                                                           | <i>A. sativa</i>       | 6                           |
| AGB56857.1          | 277           | Gliadin-like avenin                                                                                                                                               | <i>A. sativa</i>       | 6                           |
| CBL51489.1          | 230           | Avenin protein, partial                                                                                                                                           | <i>A. sativa</i>       | 6                           |
| CCH22495.1          | 230           | Avenin, partial                                                                                                                                                   | <i>A. sativa</i>       | 6                           |
| CCH22496.1          | 230           | Avenin                                                                                                                                                            | <i>A. insularis</i>    | 6                           |
| AGB56872.1          | 225           | Gliadin-like avenin                                                                                                                                               | <i>A. sativa</i>       | 5                           |
| CCC80650.1          | 202           | Avenin protein, partial                                                                                                                                           | <i>A. prostrata</i>    | 5                           |
| Q09114.1            | 189           | RecName: Full=Avenin-E; AltName: Full=Alpha-2 avenin; AltName: Full=Avenin N9; AltName: Full=Celiac immunoreactive protein 3; Short=CIP-3; AltName: Full=Prolamin | <i>A. sativa</i>       | 5                           |
| CCC80653.1          | 181           | Avenin protein, partial                                                                                                                                           | <i>A. strigosa</i>     | 4                           |
| AAA32716.1          | 181           | Avenin                                                                                                                                                            | <i>A. sativa</i>       | 4                           |
| CCC80651.1          | 181           | Avenin protein, partial                                                                                                                                           | <i>A. longiglumis</i>  | 4                           |
| CCC80677.1          | 159           | Avenin protein, partial                                                                                                                                           | <i>A. macrostachya</i> | 4                           |
| CCC80673.1          | 158           | Avenin protein, partial                                                                                                                                           | <i>A. murphyi</i>      | 4                           |
| AGB56858.1          | 158           | Gliadin-like avenin                                                                                                                                               | <i>A. sativa</i>       | 4                           |
| CBL51488.1          | 158           | Avenin protein, partial                                                                                                                                           | <i>A. sativa</i>       | 4                           |
| AGB56866.1          | 148           | Gliadin-like avenin                                                                                                                                               | <i>A. sativa</i>       | 3                           |
| AGB56870.1          | 148           | Gliadin-like avenin                                                                                                                                               | <i>A. sativa</i>       | 3                           |
| CCC80672.1          | 148           | Avenin protein, partial                                                                                                                                           | <i>A. murphyi</i>      | 3                           |
| CCC80644.1          | 148           | Avenin protein, partial                                                                                                                                           | <i>A. damascena</i>    | 3                           |
| CCC80640.1          | 148           | Avenin protein, partial                                                                                                                                           | <i>A. strigosa</i>     | 3                           |
| AGB56874.1          | 147           | Gliadin-like avenin                                                                                                                                               | <i>A. sativa</i>       | 3                           |
| CCC80676.1          | 129           | Avenin protein, partial                                                                                                                                           | <i>A. insularis</i>    | 3                           |
| CCC80647.1          | 129           | Avenin protein, partial                                                                                                                                           | <i>A. canariensis</i>  | 3                           |
| AGB56868.1          | 118           | Gliadin-like avenin                                                                                                                                               | <i>A. sativa</i>       | 3                           |
| CCC80661.1          | 98            | Avenin protein, partial                                                                                                                                           | <i>A. ventricosa</i>   | 3                           |
| CCC80659.1          | 98            | Avenin protein, partial                                                                                                                                           | <i>A. clauda</i>       | 3                           |

|            |    |                                                                                                                                          |                       |   |
|------------|----|------------------------------------------------------------------------------------------------------------------------------------------|-----------------------|---|
| Q09097.1   | 94 | RecName: Full=Avenin-F; AltName: Full=Celiac immunoreactive protein 2; Short=CIP-2; AltName: Full=Gamma-3-avenin; AltName: Full=Prolamin | <i>A. sativa</i>      | 3 |
| AAB32025.1 | 77 | Alcohol-soluble avenin-3=23.2 kda protein [Avena sativa=oat, Narymsky 943, Peptide, 201 aa]                                              | <i>A. sativa</i>      | 2 |
| P80356.1   | 77 | RecName: Full=Avenin-3; AltName: Full=Prolamin; Flags: Precursor                                                                         | <i>A. sativa</i>      | 2 |
| CBL51495.1 | 77 | Avenin protein, partial                                                                                                                  | <i>A. sativa</i>      | 2 |
| CCC80642.1 | 77 | Avenin protein, partial                                                                                                                  | <i>A. canariensis</i> | 2 |
| CCC80654.1 | 77 | Avenin protein, partial                                                                                                                  | <i>A. longiglumis</i> | 2 |
| CCC80666.1 | 77 | Avenin protein, partial                                                                                                                  | <i>A. magna</i>       | 2 |
| AGB56873.1 | 77 | Gliadin-like avenin                                                                                                                      | <i>A. sativa</i>      | 2 |
| AGB56869.1 | 77 | Gliadin-like avenin                                                                                                                      | <i>A. sativa</i>      | 2 |
